# Supplementary material
Source: PubMed Central journal article supplement (PMC6439551)
Supplement: jamacardiol-e190014-s001.pdf [file jamacardiol-e190014-s001.pdf]

## Supplementary Online Content

Hochman JS, Reynolds HR, Bangalore S, et al; the ISCHEMIA Research Group. Baseline characteristics and risk profiles of participants in the ISCHEMIA randomized clinical trial. *JAMA Cardiol*. Published online February 27, 2019. doi:10.1001/jamacardio.2019.0014

**eTable 1.** Site Personnel

**eTable 2.** Committees, CCC, Study Centers Personnel

**eTable 3.** Ischemia Definitions

**eTable 4.** Randomized Participant Baseline Vital Signs and Laboratory Values Intent-to-Treat Population

**eTable 5.** Randomized Participant Baseline Medications Intent-to-Treat Population

This supplementary material has been provided by the authors to give readers additional information about their work.

**eTable 1  
Site Personnel**

| Country (No. Randomizations) | Investigator(s)             | Study Coordinator(s)          | City & State (if applicable) | Institution (No. Randomizations)                        |
|------------------------------|-----------------------------|-------------------------------|------------------------------|---------------------------------------------------------|
| *United States (853)         |                             |                               |                              |                                                         |
| Country Leader               |                             |                               |                              |                                                         |
| David J. Maron, MD           |                             |                               |                              |                                                         |
| Regional Leader for VA Sites |                             |                               |                              |                                                         |
| William E. Boden, MD         |                             |                               |                              |                                                         |
|                              | Kreton Mavromatis, MD       | John Doan, MD                 | Decatur, GA                  | Atlanta VA Medical Center (139)                         |
|                              | Jason Linefsky, MD          | Raven Lee, CCRP               |                              |                                                         |
|                              |                             | Risha Patel                   |                              |                                                         |
|                              | Todd Miller, MD             | So Yang Cho                   | Rochester, MN                | Mayo Clinic (50)                                        |
|                              |                             | Susan Milbrandt               |                              |                                                         |
|                              |                             | Dawn Shelstad                 |                              |                                                         |
|                              | Subhash Banerjee, MD        | Preeti Kamath, BDS, MHA, CCRP | Dallas, TX                   | V.A. North Texas Health Care System (35)                |
|                              |                             | Ishita Tejani, BDS, MS, MSPH  |                              |                                                         |
|                              | Harmony R. Reynolds, MD     | Stanley E. Cobos, BA          | New York, NY                 | NYU Langone Medical Center- Bellevue Hospital (26)      |
|                              | Jonathan D. Newman, MD, MPH | Kirsten J. Quiles, MS         |                              |                                                         |
|                              | Sripal Bangalore, MD        | Raven R. Dwyer, MPH           |                              |                                                         |
|                              | Robert M. Donnino, MD       | Dalisa Espinosa, MBS          |                              |                                                         |
|                              | Lawrence M. Phillips, MD    |                               |                              |                                                         |
|                              | Muhamed Saric, MD, PhD      |                               |                              |                                                         |
|                              | Khaled Abdul-Nour, MD       | Allison Schley, BS            | Detroit, MI                  | Henry Ford Health System (21)                           |
|                              |                             | Heather Golden                |                              |                                                         |
|                              | Peter H. Stone, MD          | Hermine Osseni, MS            | Boston, MA                   | Brigham & Women's Hospital, Harvard Medical School (21) |
|                              |                             | Charlene Wiyarand             |                              |                                                         |
|                              |                             | Peter Douglass, BA            |                              |                                                         |
|                              |                             | Hayley Pomeroy, BA            |                              |                                                         |
|                              |                             | Alexandra Craft, BA           |                              |                                                         |
|                              |                             | Bethany Harvey, BA            |                              |                                                         |
|                              | James J. Jang, MD           | Olivia Anaya                  | San Jose, CA                 | Kaiser Permanente San Jose (18)                         |
|                              | Gennie Yee, MD              | Phoebe Goold, RN              |                              |                                                         |
|                              | Steven Weitz, MD            | Steven Giovannone             | Schenectady, NY              | Cardiology Associates of Schenectady P.C. (17)          |
|                              |                             | Lori Pritchard, RN            |                              |                                                         |

|  |                                                 |                          |                 |                                                             |
|--|-------------------------------------------------|--------------------------|-----------------|-------------------------------------------------------------|
|  | Suzanne Arnold, MD                              | Rosann Gans, RN          | Kansas City, MO | Saint Luke's Hospital (17)                                  |
|  | James Henry O'Keefe, Jr, MD (PI from 2012-2016) | Paul Kennedy, RN         |                 |                                                             |
|  | Michael D. Shapiro, DO                          | Shobana Ganesan, PhD     | Portland, OR    | Oregon Health & Science University (17)                     |
|  |                                                 | David Schlichting, LPN   |                 |                                                             |
|  |                                                 | Aynun Naher              |                 |                                                             |
|  | Mohammad El-Hajjar, MD                          |                          | Albany, NY      | Albany Medical Center Hospital (16)                         |
|  | Mandeep S. Sidhu, MD, MBA                       |                          |                 |                                                             |
|  | Steven A. Fein, MD                              | Wendy L. Stewart, MS     |                 |                                                             |
|  | Mikhail T. Torosoff, MD, PhD                    | Kristin M. Salmi, BS     |                 |                                                             |
|  | Radmila Lyubarova, MD                           |                          |                 |                                                             |
|  | Sulagna Mookherjee, MD                          |                          |                 |                                                             |
|  | Krzysztof Drzymalski, MD                        |                          |                 |                                                             |
|  | Edward O. McFalls, MD, PhD                      |                          | Minneapolis, MN | Minneapolis VAMC (15)                                       |
|  | Santiago A. Garcia, MD                          |                          |                 |                                                             |
|  | Stefan C. Bertog, MD                            | Debra K. Johnson, RN     |                 |                                                             |
|  | Rizwan A. Siddiqui, MD                          | Rebekah R. Herrmann, RN  |                 |                                                             |
|  | Areef Ishani, MD                                |                          |                 |                                                             |
|  | Ronnell A. Hansen, MD                           |                          |                 |                                                             |
|  | Michel Georges Khouri, MD                       | Kristine Arges           | Durham, NC      | Duke University Medical Center (15)                         |
|  |                                                 | Melissa LeFevre          |                 |                                                             |
|  |                                                 | Jennifer Tomfohr         |                 |                                                             |
|  | Jonathan L. Goldberg, MS, MD                    | Kimberly Ann Byrne       | Cleveland, OH   | Louis Stokes Cleveland Veterans Affairs Medical Center (14) |
|  |                                                 | Taissa Zappernick        |                 |                                                             |
|  | Richard Goldweit, MD                            | Sallie Canada            | Englewood, NJ   | Englewood Hospital and Medical Center (13)                  |
|  |                                                 | Meghana Kakade           |                 |                                                             |
|  |                                                 | Patricia Mieses          |                 |                                                             |
|  |                                                 | Stanley E. Cobos, BA     | Brooklyn, NY    | NYU-HHC Woodhull Hospital (12)                              |
|  |                                                 | Raven R. Dwyer, MPH      |                 |                                                             |
|  | Ronny A. Cohen, MD                              | Dalisa Espinosa, MBS     |                 |                                                             |
|  | Brooks Mirrer, MD                               | Kirsten J. Quiles, MS    |                 |                                                             |
|  | Victor Navarro, MD                              | Magdalena Rantinella, BS |                 |                                                             |
|  |                                                 | Jessica Rodriguez, BS    |                 |                                                             |
|  |                                                 | Olivia Mancilla, BS      |                 |                                                             |

|  |                               |                             |                   |                                                          |
|--|-------------------------------|-----------------------------|-------------------|----------------------------------------------------------|
|  | David E. Winchester, MD, MS   | Susan Stinson, RN           | Gainesville, FL   | Malcom Randall VAMC (11)                                 |
|  | Marvin Kronenberg, MD         | Terry Weyand                | Nashville, TN     | Vanderbilt University Medical Center (11)                |
|  | Philip Rogal, MD              | Sherron C. Crook            |                   |                                                          |
|  | Christopher McFarren, MD      |                             |                   |                                                          |
|  | John F. Heitner, MD           | Jean Ho                     | Brooklyn, NY      | New York - Presbyterian/Brooklyn Methodist Hospital (10) |
|  |                               | Saadat Khan                 |                   |                                                          |
|  |                               | Mahmoud Mohamed             |                   |                                                          |
|  | Ira M. Dauber, MD             | Mary R. Soltau, RN          | Littleton, CO     | South Denver Cardiology Associates, P.C. (10)            |
|  |                               | Delsa K. Rose, RN           |                   |                                                          |
|  |                               | Rebecca J. Wimmer, RN       |                   |                                                          |
|  |                               | Kathy E. Siegel, RN         |                   |                                                          |
|  |                               | Susan Derbyshire            |                   |                                                          |
|  | Charles Cannan, MD            | Michelle Dixon              | Portland, OR      | Providence Heart and Vascular Institute (10)             |
|  |                               | Gerald Leonard              |                   |                                                          |
|  | Sriram Sudarshan, MD          | Ciarra Heard, LVN           | Wichita Falls, TX | Wichita Falls Heart Clinic (9)                           |
|  |                               | Viviana Gabriel, LVN        |                   |                                                          |
|  |                               | Sukie Desire                |                   |                                                          |
|  | Puja K. Mehta, MD             |                             | Atlanta, GA       | Emory University (9)                                     |
|  | Michael McDaniel, MD          | Fauzia Rashid, PhD          |                   |                                                          |
|  | Stamatios Lerakis, MD         | Senait Asier                |                   |                                                          |
|  | Arshed Quyyumi, MD            | Keyur Patel                 |                   |                                                          |
|  | Nanette K. Wenger, MD         |                             |                   |                                                          |
|  | Chester M. Hedgepeth, MD, PhD | Jennifer Gillis, APRN       | Warwick, RI       | Kent Hospital (9)                                        |
|  | Heather Hurlburt, MD          | Megan Manocchia, RN         |                   |                                                          |
|  | Alan Rosen, MD                | Susan Moore, RN             |                   |                                                          |
|  |                               | Elizabeth Congdon           |                   |                                                          |
|  | Zakir Sahul, MD               | Gail Brandt                 | Ypsilanti, MI     | Michigan Heart, PC (9)                                   |
|  |                               | Nora Marchelletta           |                   |                                                          |
|  |                               | Kristina Wippler            |                   |                                                          |
|  | David Booth, MD               | Yvonne Taul, RN             | Lexington, KY     | University of Kentucky (8)                               |
|  | Steve Leung, MD               | Jennifer Isaacs, MS         |                   |                                                          |
|  | Ahmed Abdel-Latif, MD, PhD    | Viktoria Bulkley, RN        |                   |                                                          |
|  | Hassan Reda, MD               | Caroline Rodgers            |                   |                                                          |
|  | Khaled Ziada, MD              |                             |                   |                                                          |
|  | Sampoornima Setty, MD         | Kimberly E. Halverson, RHIT | La Crosse, WI     | Gundersen Lutheran Medical Center (8)                    |
|  |                               | Christine Roraff, RN        |                   |                                                          |

|  |                                        |                         |                          |                                                    |
|--|----------------------------------------|-------------------------|--------------------------|----------------------------------------------------|
|  |                                        | Jonean Thorsen, RN      |                          |                                                    |
|  | Rajat S. Barua, MD, PhD                | Amarachi Ojajuni        | Kansas City, MO          | Kansas City VA Medical Center (8)                  |
|  |                                        | Oni Olurinde            |                          |                                                    |
|  |                                        | Kamalakar Surineni      |                          |                                                    |
|  | Fadi Hage, MD                          | Badhma Valaiyapathi, MD | Birmingham, AL           | UAB Vascular Biology and Hypertension Program (8)  |
|  | Christiano Caldeira, MD                |                         |                          |                                                    |
|  | James E. Davies, MD                    |                         |                          |                                                    |
|  | Massoud Leesar, MD                     |                         |                          |                                                    |
|  | Jaekyeong Heo, MD                      |                         |                          |                                                    |
|  | Amy Iskandrian, MD                     |                         |                          |                                                    |
|  | Firas Al Solaiman, MD                  |                         |                          |                                                    |
|  | Satinder Singh, MD                     |                         |                          |                                                    |
|  | Khaled Dajani, MD                      |                         |                          |                                                    |
|  | Mohammad El-Hajjar, MD                 |                         | Albany, NY               | Samuel Stratton VA Medical Center of Albany NY (7) |
|  | Paul Der Mesropian, MD                 |                         |                          |                                                    |
|  | Joseph Sacco, MD                       | Michele Rawlins, NP     |                          |                                                    |
|  | Brian McCandless, MD                   | Jennifer Thomson, MA    |                          |                                                    |
|  | Marisa Orgera, MD                      |                         |                          |                                                    |
|  | Mandeep S. Sidhu, MD, MBA (2012-2016 ) |                         |                          |                                                    |
|  |                                        | Mary Colleen Rogge, RN  | Cincinnati, OH           | Cincinnati VA Medical Center (7)                   |
|  | Imran Arif, MD                         | Julie Bunke , BA        |                          |                                                    |
|  | Hanan Kerr, MD                         | Kendra Unterbrink , PA  |                          |                                                    |
|  |                                        | Jacqueline Fannon, RN   |                          |                                                    |
|  |                                        | Cynthia Burman, NP      |                          |                                                    |
|  | Jorge F. Trejo (Gutierrez), MD         | Marcia F. Dubin, CCRP   | Jacksonville, FL         | Mayo Clinic Florida (7)                            |
|  | Gerald Fletcher, MD                    |                         |                          |                                                    |
|  | Gary E. Lane, MD                       |                         |                          |                                                    |
|  | Lynn M. Neeson, DNP                    |                         |                          |                                                    |
|  | Pragnesh P. Parikh, MD                 |                         |                          |                                                    |
|  | Peter M. Pollak, MD                    |                         |                          |                                                    |
|  | Brian P. Shapiro, MD                   |                         |                          |                                                    |
|  | Kevin Landolfo, MD                     |                         |                          |                                                    |
|  | Anthony Gemignani, MD                  | Sarah Beaudry, RN       | White River Junction, VT | VAMC-White River Junction (7)                      |
|  | Daniel O'Rourke, MD                    |                         |                          |                                                    |

|  |                          |                                   |                   |                                                        |                     |
|--|--------------------------|-----------------------------------|-------------------|--------------------------------------------------------|---------------------|
|  | Judith L. Meadows, MD    | Stephanie A. Tirado, RN           | West Haven, CT    | VA Connecticut Healthcare System (7)                   |                     |
|  |                          | Janet Halliday                    |                   |                                                        |                     |
|  |                          | Pamela Julian                     |                   |                                                        |                     |
|  | Jason T. Call, MD        | Stephanie, M. Lane, RN, BSN, CCRN | Winchester, VA    | Winchester Cardiology and Vascular Medicine, PC (7)    |                     |
|  |                          | Jennifer L. Stanford, RN, MSN     |                   |                                                        |                     |
|  | Joseph Hannan, MD        |                                   | Worcester, MA     | Saint Vincent Hospital at Worcester Medical Center (7) |                     |
|  | Robert Bojar, MD         | Patricia Arsenault, RN            |                   |                                                        |                     |
|  | Deepti Kumar, MD         | Pamela Sigel, RN                  |                   |                                                        |                     |
|  | John Mukai, MD           |                                   |                   |                                                        |                     |
|  | Edward T. Martin, MS, MD | Miriam Brooks                     | Tulsa, OK         | Oklahoma Heart Institute (7)                           |                     |
|  | Gabriel Vorobiof, MD     | Ladda Douangvila                  | Los Angeles, CA   | Ronald Reagan UCLA Medical Center (7)                  |                     |
|  |                          | Rubine Gevorgyan                  |                   |                                                        |                     |
|  | Alec Moorman, MD         | Fatima Ranjbaran, RN              | Seattle, WA       | University of Washington Medical Center (7)            |                     |
|  |                          | Bryn Smith, BS                    |                   |                                                        |                     |
|  |                          | Carly Ohmart                      |                   |                                                        |                     |
|  | Scott Kinlay, MBBS, PhD  |                                   | West Roxbury, MA  | VA Boston Healthcare System (6)                        |                     |
|  | Robert J. Hamburger, MD  |                                   |                   |                                                        |                     |
|  | Thomas P. Rocco, MD      | Samantha Ly, MA                   |                   |                                                        |                     |
|  | Deepak L. Bhatt, MD, MPH | Margot C. Quinn, BA               |                   |                                                        |                     |
|  | Kevin Croce, MD, PhD     | Sara Temiyasathit, PhD            |                   |                                                        |                     |
|  | Jacquelyn A Quin, MD     | Jacquelyn Do, MPH                 |                   |                                                        |                     |
|  | Jati Anumpa, MD          | Desiree Tobin, MPH                |                   |                                                        |                     |
|  | Marco Zenati, MD, MSc    |                                   |                   |                                                        |                     |
|  | David P Faxon, MD        |                                   |                   |                                                        |                     |
|  | Glenn Rayos, MD          | Jennifer Langdon                  | Daytona Beach, FL | Daytona Heart Group (6)                                |                     |
|  |                          |                                   |                   |                                                        | Marcia Werner Bayer |
|  | Ashraf Seedhom, MD       | Amanda O'Malley                   | Albany, NY        | Capital Cardiology Associates (6)                      |                     |
|  | Lance Sullenberger, MD   | Erin Orvis                        |                   |                                                        |                     |
|  | Gregory Kumkumian, MD    | Mandy Murphy, RN                  | Bethesda, MD      | NIH Heart Center at Suburban Hospital (6)              |                     |
|  |                          |                                   |                   |                                                        | Ann Greenberg, RN   |
|  |                          |                                   |                   |                                                        | Margaret Iraola, RN |
|  | Steven P. Sedlis, MD     | Leandro C. Maranan, CCRC          | New York, NY      | VA New York Harbor Health Care System (6)              |                     |
|  | Robert M. Donnino, MD    |                                   |                   |                                                        |                     |
|  | Jeffrey Lorin, MD        |                                   |                   |                                                        |                     |

|  |                                 |                               |                     |                                                        |
|--|---------------------------------|-------------------------------|---------------------|--------------------------------------------------------|
|  | Jacqueline E. Tamis-Holland, MD | Ammy Malinay, RN              | Ridgewood, NJ       | Mount Sinai Saint Luke's Hospital (6)                  |
|  | Robert Kornberg, MD             |                               |                     |                                                        |
|  | Robert Leber, MD                |                               |                     |                                                        |
|  | Souheil Saba, MD                | Candice P. Edillo, RN         | Southfield, MI      | Providence - Providence Park Hospital (6)              |
|  | Michael W. Lee, MD              |                               |                     |                                                        |
|  | Delano R. Small, MD             |                               |                     |                                                        |
|  | Wassim Nona, MD                 |                               |                     |                                                        |
|  | Patrick B. Alexander, MD        |                               |                     |                                                        |
|  | Iram Rehman, MD                 |                               |                     |                                                        |
|  | Umesh Badami, MD                | Ann Ostrander, RN             | Saginaw, MI         | Covenant Medical Center, Inc. (5)                      |
|  |                                 | Stephanie Wasmiller, RN       |                     |                                                        |
|  | Kevin Marzo, MD                 | Wendy Drewes, RN              | Mineola, NY         | NYU Winthrop (5)                                       |
|  |                                 | Dipti Patel, RN               |                     |                                                        |
|  | Inga H. Robbins, MD             |                               | Pomona, NJ          | AtlantiCare Regional Medical Center (5)                |
|  | Howard A. Levite, MD            | Jackie M White, RN, BSN CCRC  |                     |                                                        |
|  | Sanjay Shetty, MD               | Alison Hallam                 |                     |                                                        |
|  | Mayuri Patel, MD                |                               |                     |                                                        |
|  | Glenn S. Hamroff, MD            | Benjamin J Spooner, RPA-C     | Cortlandt Manor, NY | NYP Medical Medical Group Hudson Valley Cardiology (5) |
|  |                                 | Linda M Hollenweger, LPN,CCRC |                     |                                                        |
|  | Raymond W. Little, MD           | Holly Little                  | Houston, TX         | Houston Heart & Vascular Associates (5)                |
|  | Brandi D. Zimbelman, FNP-C      | Tiffany Little                |                     |                                                        |
|  | Charles Y. Lui, MD              | Nona A Eskelson, RN           | Salt Lake City, UT  | Salt Lake City VA Medical Center (4)                   |
|  | Brigham R. Smith, MD            |                               |                     |                                                        |
|  | Daniel P. Vezina, MD, MSC       |                               |                     |                                                        |
|  | Lillian L. Khor, MBBCh, MSc     |                               |                     |                                                        |
|  | Josephine D. Abraham, MD, MPH   |                               |                     |                                                        |
|  | David A. Bull, MD               |                               |                     |                                                        |
|  | Stephen H. McKellar, MD, MSc    |                               |                     |                                                        |
|  | David Booth, MD                 | Yvonne Taul, RN               | Lexington, KY       | Lexington VA Medical Center (4)                        |
|  | John Kotter, MD                 | Caroline Rodgers, RN          |                     |                                                        |
|  | Ahmed Abdel-Latif, MD, PhD      | Jennifer Isaacs, MS           |                     |                                                        |
|  |                                 | Viktoria Bulkley              |                     |                                                        |
|  | Bob Hu, MD                      | Renee Kaneshiro               | Palo Alto, CA       | Palo Alto Medical Foundation Research Institute (4)    |

|  |                           |                                 |                  |                                                     |
|--|---------------------------|---------------------------------|------------------|-----------------------------------------------------|
|  | Arthur J. Labovitz, MD    |                                 | Tampa, FL        | University of South Florida (4)                     |
|  | Michael Berlowitz, MD     | Bonnie J. Kirby, RN, MSN        |                  |                                                     |
|  | Philip Rogal, MD          | Nhi N. Tran, MS                 |                  |                                                     |
|  | Christopher McFarren, MD  | Catherine Jahrsdorfer, RN, BSN  |                  |                                                     |
|  | Fadi Matar, MD            |                                 |                  |                                                     |
|  | Christiano Caldeira, MD   |                                 | Stanford, CA     | Stanford University School of Medicine (4)          |
|  | David J. Maron, MD        |                                 |                  |                                                     |
|  | Fatima Rodriguez, MD, MPH | Reem Yunis, PhD                 |                  |                                                     |
|  | Ingela Schnittger, MD     | Jhina Patro                     |                  |                                                     |
|  | William F. Fearon, MD     |                                 | Fresno, CA       | UCSF - Fresno Community Regional Medical Center (4) |
|  | Prakash Deedwania, MD     | Antonia Vega                    |                  |                                                     |
|  | Kiran Reddy, MD           |                                 | New York, NY     | Icahn School of Medicine at Mount Sinai (4)         |
|  | Joseph Sweeny, MD         | Hugo Bloise-Adames              |                  |                                                     |
|  |                           | Santa Jimenez                   |                  |                                                     |
|  |                           | Nicole Saint Vrestil            |                  |                                                     |
|  |                           | Reyna Bhandari                  |                  |                                                     |
|  | Christopher Spizzieri, MD | Danielle Schade                 | Camp Hill, PA    | Holy Spirit Hospital Cardiovascular Institute (4)   |
|  |                           | Roxanne Yost                    |                  |                                                     |
|  | Claudia P Hochberg, MD    | Paula Beardsley                 | Boston, MA       | Boston Medical Center (4)                           |
|  |                           | Denise Fine                     |                  |                                                     |
|  | William D. Salerno, MD    | Jana Tancredi, RN, MA/MSN, CCRN | Saddle Brook, NJ | Hackensack University Medical Center (4)            |
|  |                           | Patricia Arakelian              |                  |                                                     |
|  |                           | Susan Mathus                    |                  |                                                     |
|  |                           | Deborah O'Neill                 |                  |                                                     |
|  | Ray Wyman, MD             | Joy Burkhardt, CCRP             | Torrance, CA     | Torrance Memorial Medical Center (4)                |
|  |                           | Suellen Hosino, RN, BSN, CCRP   |                  |                                                     |
|  |                           |                                 |                  |                                                     |
|  |                           | Oksana A. Lubyanyaya, BA        | Santa Ana, CA    | Coastal Heart Medical Group (4)                     |
|  |                           | Jose D. Salas, BS               |                  |                                                     |
|  | Amer Zarka, MD            | Maria Aguirre                   |                  |                                                     |
|  | Anil V. Shah, MD          | Manu Dhawan                     |                  |                                                     |
|  |                           | Diana Parra                     |                  |                                                     |
|  |                           | Tri Tran                        |                  |                                                     |
|  | Thomas Haldis, DO         | Catherine Weick, BSRT(R)(VI)    | Fargo, ND        | Sanford Health (4)                                  |
|  |                           | Katie Fowler-Lehman, BSN        |                  |                                                     |
|  |                           | Natalie Spitzer, BSN            |                  |                                                     |

|  |                           |                              |                      |                                                    |
|--|---------------------------|------------------------------|----------------------|----------------------------------------------------|
|  |                           | Casey Riedberger             |                      |                                                    |
|  |                           | Catherine Weick              |                      |                                                    |
|  | Jeffrey A. Kohn, MD       | Stanley E. Cobos, BA         | New York, NY         | NYU New York Medical Associates (4)                |
|  |                           | Raven R. Dwyer, MPH          |                      |                                                    |
|  |                           | Dalisa Espinosa, MBS         |                      |                                                    |
|  |                           | Kirsten J. Quiles, MS        |                      |                                                    |
|  | Saket Girotra, MD         | Carrie Drum, RN              | Iowa City, IA        | University of Iowa Hospitals and Clinics (4)       |
|  |                           | Kimberly Miller-Cox, RN      |                      |                                                    |
|  |                           | Amy Ollinger, RN             |                      |                                                    |
|  | Omar Almousalli, MD       | Elizabeth Capasso-Gulve      | Fairview Heights, IL | Advanced Heart Care Group (4)                      |
|  |                           | Alaine Melanie Loehr         |                      |                                                    |
|  |                           | Marlowe Mosley               |                      |                                                    |
|  | Mayil S. Krishnam, MD     | Shirin Heydari, MS           | Orange, CA           | University of California Irvine Medical Center (3) |
|  | Jeffrey C. Milliken, MD   | Andrea M. Lundeen, MA        |                      |                                                    |
|  | Pranav M. Patel, MD       | Edgar Karanjah, MD           |                      |                                                    |
|  | Arnold H. Seto, MD        | Wanda C. Marfori, MD         |                      |                                                    |
|  | Kevin T. Harley, MD       | Eduardo Hernandez-Rangel, MD |                      |                                                    |
|  | Michael A. Gibson, MD     | Pam Singh                    |                      |                                                    |
|  | Byron J. Allen, MD        |                              |                      |                                                    |
|  | Rita Coram, MD            | Anne Marie Webb, BSN         | Louisville, KY       | University of Louisville (3)                       |
|  |                           | Ellie Fridell, BS            |                      |                                                    |
|  |                           | Heidi Wilson, BS             |                      |                                                    |
|  | Sabu Thomas, MD, MSc      | Angela Kim, BS               | Rochester, NY        | University of Rochester (3)                        |
|  | Ronald G Schwartz, MD, MS | Patrick Wilmot, BS           |                      |                                                    |
|  | Wei Chen, MD, MS          |                              |                      |                                                    |
|  | Mahfouz El Shahawy, MD    | Ramona Stevens               | Sarasota, FL         | Cardiovascular Center of Sarasota (3)              |
|  | James Stafford, MD        | Loriane Black                | Baltimore, MD        | University of Maryland Medical Center (3)          |
|  | William B. Abernethy, MD  | Amber B. Hull, RN            | Asheville, NC        | Asheville Cardiology Associates (3)                |
|  |                           | Olivia J. Lim, RN            |                      |                                                    |
|  |                           | Helen C. Tucker              |                      |                                                    |
|  |                           | Natasha C. Putnam, RN        |                      |                                                    |
|  |                           | Linda L. Hall                |                      |                                                    |
|  |                           | Tia Cauthren                 |                      |                                                    |
|  |                           | Trish Tucker                 |                      |                                                    |
|  | Andrew Zurick, MD         | Hollie Horton                | Nashville, TN        |                                                    |

|  |                              |                              |                  |                                                       |
|--|------------------------------|------------------------------|------------------|-------------------------------------------------------|
|  |                              | Jan Orga                     |                  | Saint Thomas Hospital (3)                             |
|  | Thomas M. Meyer, MD          | Joyce R. White, MSN NP-C     | Lynchburg, VA    | Stroobants Cardiovascular Center (3)                  |
|  | Ronald G. Morford, MD        | Cynthia Baumann, RN          |                  |                                                       |
|  | Bruce Rutkin, MD             | Vidya Seeratan               | Manhasset, NY    | Northwell Health - Manhasset (3)                      |
|  | Sabahat Bokhari, MD          | Magnolia Jimenez             | New York, NY     | Columbia University Medical Center (3)                |
|  | Seth I. Sokol, MD            | Cidney Schultz, RN           | Bronx, NY        | Jacobi Medical Center (3)                             |
|  | Jay Meisner, MD              | Jeanne Russo, RN             |                  |                                                       |
|  | Ihab Hamzeh, MD              |                              | Houston, TX      | Baylor College of Medicine (3)                        |
|  | Arunima Misra, MD            | Zohra Huda, RN, BSN, CCRP    |                  |                                                       |
|  | Matthew Wall Jr., MD         | Araceli Boan                 |                  |                                                       |
|  | Veronica Lenges De Rosen, MD |                              |                  |                                                       |
|  | Mahboob Alam, MD             |                              |                  |                                                       |
|  | Michael C. Turner, MD        | Christine R Hinton           | Lake Charles, LA | Cardiovascular Specialists of Southwest Louisiana (3) |
|  | Thomas J. Mulhearn, MD       |                              |                  |                                                       |
|  | Arnold P. Good, MD           | Beth A. Archer, BSN, RN      | Columbus, OH     | Ohio Health Grant Medical Center (3)                  |
|  |                              | Julia S. Dionne, BA          |                  |                                                       |
|  |                              | Cheryl A. Allardyce, BSN, RN |                  |                                                       |
|  |                              | Lindsey N. Sikora, BSN, RN   |                  |                                                       |
|  |                              | Jennifer H. Czerniak, RN     |                  |                                                       |
|  |                              | Jennifer A. Mull, MSN, RN    |                  |                                                       |
|  |                              | Elizabeth Ferguson           |                  |                                                       |
|  |                              | Frances Laube                |                  |                                                       |
|  | Nicolas W. Shammas, MD, MS   | Gail A Shammas, BSN, RN      | Davenport, IA    | Midwest Cardiovascular Research Foundation (3)        |
|  |                              | Lori Christensen             |                  |                                                       |
|  |                              | Holly Park                   |                  |                                                       |
|  | Robert Chilton, MD           | Joan Hecht                   | San Antonio, TX  | Audie Murphy V.A. (2)                                 |
|  | Patricia K. Nguyen, MD       | Davis Vo, BS                 | Palo Alto, CA    | VA Palo Alto Healthcare System (2)                    |
|  |                              | James Hirsch                 |                  |                                                       |
|  | Matthew Jezior, MD           | Jody Bindeman                | Bethesda, MD     | Walter Reed National Military Medical Center (2)      |
|  |                              | Sara Salkind                 |                  |                                                       |
|  |                              | Dalisa Espinosa, MBS         | Providence, RI   | Miriam Hospital (2)                                   |
|  |                              | Lori-Ann Desimone, BSN       |                  |                                                       |
|  | Paul C. Gordon, MD           | Lina Felix-Stern             |                  |                                                       |
|  | Thomas Crain, MD             | Jassira Gomes                |                  |                                                       |

|  |                                       |                              |                  |                                                             |
|--|---------------------------------------|------------------------------|------------------|-------------------------------------------------------------|
|  |                                       | Catherine Gordon, BSN        |                  |                                                             |
|  | Robert Stenberg, MD                   | Aimee Mann                   | Johnstown, PA    | Conemaugh Valley Memorial Hospital (2)                      |
|  |                                       | Theresa McCreary             |                  |                                                             |
|  | Ronald P. Pedalino, MD                | Stanley E. Cobos, BA         | Brooklyn, NY     | NYU-HHC Kings County Hospital Center (2)                    |
|  |                                       | Raven R. Dwyer, MPH          |                  |                                                             |
|  |                                       | Dalisa Espinosa, MBS         |                  |                                                             |
|  |                                       | Kirsten J. Quiles, MS        |                  |                                                             |
|  | Joseph Wiesel, MD                     | Stanley E. Cobos, BA         | Flushing, NY     | New York University - Langone Cardiovascular Associates (2) |
|  |                                       | Raven R. Dwyer, MPH          |                  |                                                             |
|  |                                       | Dalisa Espinosa, MBS         |                  |                                                             |
|  |                                       | Kirsten J. Quiles, MS        |                  |                                                             |
|  | George J. Juang, MD                   | Candace Gopaul, BS           | Brooklyn, NY     | Coney Island Hospital (2)                                   |
|  |                                       | Karen Hultberg               |                  |                                                             |
|  |                                       | Tauqir Huk                   |                  |                                                             |
|  |                                       | Afshan Hussain               |                  |                                                             |
|  | Mohammed Al-Amoodi, MD                | Yesenia Zambrano, BS         | Yuma, AZ         | Yuma Regional Medical Center (2)                            |
|  |                                       | Sarah Medina Rodriguez       |                  |                                                             |
|  |                                       | Trudie Milner                |                  |                                                             |
|  | David Wohns, MD                       | Abbey Mulder, RN             | Grand Rapids, MI | Spectrum Health (2)                                         |
|  |                                       | Stacie Van Oosterhout, MEd   |                  |                                                             |
|  | Ellis W. Lader, MD                    | Martha Meyer, RN, MSN        | Kingston, NY     | Mid Valley Cardiology (1)                                   |
|  | Michael Mumma, MD                     | Nancy L. Clapp, RN, BA, CCRC | Sarasota, FL     | Sarasota Memorial Hospital (1)                              |
|  |                                       | Heather Barrentine           |                  |                                                             |
|  | Lekshmi Dharmarajan, MD               | Jenne M. Jose, PA            | Bronx, NY        | NYU-HHC Lincoln Medical and Mental Health Center (1)        |
|  |                                       | Stanley E. Cobos, BA         |                  |                                                             |
|  |                                       | Raven R. Dwyer, MPH          |                  |                                                             |
|  |                                       | Dalisa Espinosa, MBS         |                  |                                                             |
|  |                                       | Kirsten J. Quiles, MS        |                  |                                                             |
|  |                                       | Jenne Manchery               |                  |                                                             |
|  | Joseph F.X. McGarvey Jr, MD           | Vera McKinney, RN            | Doylestown, PA   | Doylestown Health Cardiology (1)                            |
|  |                                       | Linda Schwarz, RN            |                  |                                                             |
|  | Thomas R. Downes, MD (till Dec. 2016) | Scott M. Kaczowski           | Loveland, CO     | Medical Center of the Rockies (1)                           |
|  | Gary J. Luckasen, MD (from Dec. 2016) | Adam J. Jaskowiak            |                  |                                                             |
|  |                                       | Joel Klitch                  |                  |                                                             |
|  | Benjamin Cheong, MD                   | Debra Dees                   | Houston, TX      | Baylor St. Luke's Medical Center (1)                        |
|  | Srinivasa Potluri, MD                 | Precilia Vasquez             | Plano, TX        | Baylor Research Institute at Legacy Heart Center (1) **     |

|                     |                                              |                                            |                   |                                                                      |
|---------------------|----------------------------------------------|--------------------------------------------|-------------------|----------------------------------------------------------------------|
|                     | Ronald A. Mastouri, MD                       |                                            | Indianapolis, IN  | Indiana University/Krannert Institute of Cardiology (1)              |
|                     | Jeffery A. Breall, MD, PhD                   | Elise L. Hannemann, RN,CCRC                |                   |                                                                      |
|                     | George E. Revtyak, MD                        | Judy Mae Foltz, RN,CCRC                    |                   |                                                                      |
|                     | Jonathan W. Bazeley, MD                      |                                            | St. Paul, MN      | HealthEast Saint Joseph's Hospital (1)                               |
|                     | Dayuan Li, MD                                | Emily DeRosa                               |                   |                                                                      |
|                     |                                              | Beth Jorgenson                             |                   |                                                                      |
|                     |                                              | Joyce Riestenberg-Smith                    |                   |                                                                      |
|                     | Kenneth Giedd, MD                            |                                            | New York, NY      | Beth Israel Medical Center (1)                                       |
|                     | Wayne Old, MD                                | Rebecca Bariciano                          | Chesapeake, VA    | Cardiovascular Associates, Ltd. (1)                                  |
|                     | Francis Burt, MD                             |                                            | Bethlehem, PA     | Saint Luke's Hospital and Health Network (1)                         |
|                     | Kozhaya Sokhon, MD                           | Jessica Waldron                            | Sugar land, TX    | Medicus Alliance Clinical Research Org., Inc. (1)                    |
|                     |                                              | Michelle Mayon                             |                   |                                                                      |
|                     | Deepika Gopal, MD                            |                                            | Plano, TX         | The Heart Hospital Baylor (1)                                        |
|                     | Uma S. Valeti, MD                            | Gretchen Ann Peichel, RN                   | Minneapolis, MN   | University of Minnesota (1)                                          |
|                     | Jon Kobashigawa, MD                          | Brandy Starks                              | Beverly Hills, CA | Cedars Sinai Medical Center (1)                                      |
|                     |                                              | Lucilla Garcia                             |                   |                                                                      |
|                     |                                              | Maria Thottam                              |                   |                                                                      |
| India (941)         |                                              |                                            |                   |                                                                      |
| Country Leader      |                                              |                                            |                   |                                                                      |
| Balram Bhargava, DM |                                              |                                            |                   |                                                                      |
|                     |                                              | Anjali Anand, MSc                          | Calicut           | Government Medical College (208)                                     |
|                     | Sajeev Chakanalil Govindan, MD, DNB, DM, PhD | Janitha Raj, B.Tech                        |                   |                                                                      |
|                     | Rajesh Gopalan Nair, MD, DNB, DM             | Reshma Ravindran, MSc                      |                   |                                                                      |
|                     |                                              | Rajalekshmi VS, MSc, MScCRRA               |                   |                                                                      |
|                     | Cholenahally Nanjappa Manjunath, MD, DM      | Nandita Nataraj, BE(Biotech) PGDICRCMD     | Bengaluru         | Sri Jayadeva Institute of Cardiovascular Sciences and Research (149) |
|                     | Nagaraja Moorthy, MD, DM                     | Soundarya Nayak, BE(Biotech) PGDICRCMD     |                   |                                                                      |
|                     | Satvic Cholenahally Manjunath, MD,DM         | Mahevamma Mylarappa, GNM (General Nursing) |                   |                                                                      |
|                     | Suryaprakash Narayanappa, MBBS               |                                            |                   |                                                                      |
|                     | Neeraj Pandit, MD, DM                        | Sheromani Bajaj                            | New Delhi         | Dr Ram Manohar Lohia Hospital (101)                                  |

|  |                              |                                   |            |                                                                      |
|--|------------------------------|-----------------------------------|------------|----------------------------------------------------------------------|
|  | Ranjit Kumar Nath, MD, DM    | Vandana Yadav, Msc,PGDACR         |            |                                                                      |
|  |                              | Girish Mishra, Msc, PGDACR        |            |                                                                      |
|  | S.K. Dwivedi, DM             | Roma Tewari, PG                   | Lucknow    | King George's Medical University, Department of Cardiology (100)     |
|  | V.S. Narain, DM              | Meenakshi Mishra, PG              |            |                                                                      |
|  | Sharad Chandra, DM           | Shivali Patel                     |            |                                                                      |
|  |                              | Suman Singh, PG                   |            |                                                                      |
|  | Gurpreet S. Wander, DM       |                                   | Ludhiana   | Hero DMC Heart Institute, Dayanand Medical College and Hospital (83) |
|  | Rohit Tandon, MD             |                                   |            |                                                                      |
|  | Sarju Ralhan, M.Ch (CTVS)    | Baljeet Kaur, MSc (Biotechnology) |            |                                                                      |
|  | Naved Aslam, DM              | Sonika Gupta , MBA, B. Pharmacy   |            |                                                                      |
|  | Abhishek Goyal, DM           |                                   |            |                                                                      |
|  | Balram Bhargava, DM          | Chandini Suvarna, BDS             | New Delhi  | All India Institute Of Medical Sciences (67)                         |
|  | G.Karthikeyan, DM            |                                   |            |                                                                      |
|  | S.Ramakrishnan, DM           |                                   |            |                                                                      |
|  | Sandeep Seth, DM             |                                   |            |                                                                      |
|  | Rakesh Yadav, DM             |                                   |            |                                                                      |
|  | Sandeep Singh, DM            |                                   |            |                                                                      |
|  | Ambuj Roy, DM                |                                   |            |                                                                      |
|  | Neeraj Parakh, DM            |                                   |            |                                                                      |
|  | Sunil Kumar Verma, DM        |                                   |            |                                                                      |
|  | Rajiv Narang, DM             |                                   |            |                                                                      |
|  | Sundeep Mishra, DM           |                                   |            |                                                                      |
|  | Nitish Naik, DM              |                                   |            |                                                                      |
|  | Gautam Sharma, DM            |                                   |            |                                                                      |
|  | Shiv Kumar Choudhary, M.Ch   |                                   |            |                                                                      |
|  | Chetan Patel, DNB            |                                   |            |                                                                      |
|  | Gurpreet Gulati, MD          |                                   |            |                                                                      |
|  | Sanjeev Sharma, MD           |                                   |            |                                                                      |
|  | V K Bahl, DM                 |                                   |            |                                                                      |
|  | Anoop Mathew, MD             | Binoy Mannekkattukudy Kurian      | Kolenchery | MOSC Medical College Hospital (39)                                   |
|  | Eapen Punnoose, MD           |                                   |            |                                                                      |
|  | Milind Avdhoot Gadkari, MD   | Sheetal Rupesh Karwa, BHMS        | Pune       | KEM Hospital Pune (35)                                               |
|  | Siddharth Gadage, MD DNB     |                                   |            |                                                                      |
|  | Tapan Umesh Pillay, BHMS MSc |                                   |            |                                                                      |

|  |                                        |                                                             |             |                                                                                 |
|--|----------------------------------------|-------------------------------------------------------------|-------------|---------------------------------------------------------------------------------|
|  | Santhosh Satheesh, MBBS, MD, DM        | R. J. Vindhya, B.Sc. (Bio-Technology), MSc(Bio-Informatics) | Pondicherry | Jawaharlal Institute of Postgraduate Medical Education & Research (JIPMER) (31) |
|  |                                        | Peeyush Jain, MD                                            | New Delhi   | Fortis Escort Heart Institute (31)                                              |
|  |                                        | Ashok Seth, MD                                              |             |                                                                                 |
|  |                                        | Zile Singh Meharwal, MD                                     |             |                                                                                 |
|  | Atul Mathur, MD                        | Atul Verma, MD                                              |             |                                                                                 |
|  | Upendra Kaul, MD                       | Mona Bhatia, MD                                             |             |                                                                                 |
|  |                                        | Ankush Sachdeva, MD                                         |             |                                                                                 |
|  |                                        | Thounaojam Indira Devi, RN                                  |             |                                                                                 |
|  |                                        | Nungshi Jungla, RN                                          |             |                                                                                 |
|  | Johann Christopher, MD, DNB            | K. Manjula Rani, MSc.                                       | Hyderabad   | Gurunanak CARE Hospital (27)                                                    |
|  | Rajeev Menon, MD, DNB                  | M. Sowjanya Reddy, BSc                                      |             |                                                                                 |
|  | Nirmal Kumar, MD, DNB                  | K. Preethi, BSc                                             |             |                                                                                 |
|  | Abraham Oomman, MD,DM,DNB              | Rinu R sidh, MSc(Clinical Research)                         | Chennai     | Apollo Research and Innovation (23)                                             |
|  | Robert Mao, MD, DM                     | Ramakrishnan T., B.Tech(Biotechnology)                      |             |                                                                                 |
|  | Hilda Solomon, PhD                     | Rajesh Francis, MSc(Clinical Research)                      |             |                                                                                 |
|  | Sudhir Naik, MD, DM                    | Vamshi Priya P., MSc                                        | Hyderabad   | Apollo Research & Innovations (13)                                              |
|  | Sajeeda Parveen Khan, MBBS, (Dip.Card) |                                                             |             |                                                                                 |
|  | Johann Christopher, MD                 | Kotiboinna Preethi                                          | Hyderabad   | CARE Nampally (11)                                                              |
|  | Nirmal Kumar, MD                       |                                                             |             |                                                                                 |
|  | Purvez Grant, MD                       | Shweta Hande, BHMS, PGDCR                                   | Pune        | Ruby Hall Clinic, Grant Medical Foundation (10)                                 |
|  |                                        | Poonam Sonawane, B.ScMicrobiology, ACCR                     |             |                                                                                 |
|  | Ranjan Kachru, MD                      | Abhishek Dubey                                              | New Delhi   | Fortis Healthcare Fl.t Lt. Rajan Dhall Hospital (4)                             |
|  |                                        | Kavita Rawat                                                |             |                                                                                 |
|  | Ajit Kumar VK, MD, DM                  |                                                             | Trivandrum  | Sree Chitra Tirunal Institute for Medical Sciences and Technology (3)           |
|  | Sanjay Ganapathi, MD, DM               |                                                             |             |                                                                                 |
|  | Jayakumar K, MS, M.Ch                  | Vineeth CP                                                  |             |                                                                                 |
|  | Harikrishnan Sivadasanpillai, MD, DM   | Manas Chacko, RN                                            |             |                                                                                 |

|                                  |                                          |                                             |                   |                                                                      |
|----------------------------------|------------------------------------------|---------------------------------------------|-------------------|----------------------------------------------------------------------|
|                                  | Bijulal Sasidharan, MD, DM               | Suresh Babu                                 |                   |                                                                      |
|                                  | Kapilamoorthy TR, MD                     |                                             |                   |                                                                      |
|                                  | Johann Christopher, MD                   | Sowjanya Reddy                              | Hyderabad         | CARE Hospital (3)                                                    |
|                                  | Praneeth Polamuri, MD                    | Manjula Rani                                |                   |                                                                      |
|                                  | Upendra Kaul, MD                         | Priyadarshani Arambam                       | New Delhi         | Batra Hospital and Medical Research Centre (BHMRC) (3)               |
|                                  |                                          | Bebek Singh                                 |                   |                                                                      |
| United Kingdom (539)             |                                          |                                             |                   |                                                                      |
| Country Leaders                  |                                          |                                             |                   |                                                                      |
| Roxy Senior, MBBS, MD, DM        |                                          |                                             |                   |                                                                      |
| Keith AA Fox, MBChB (past)       |                                          |                                             |                   |                                                                      |
| Country Coordinators             |                                          |                                             |                   |                                                                      |
| Grace M. Young , MSc, BSc (Hons) |                                          |                                             |                   |                                                                      |
| Kathryn Carruthers (past)        |                                          |                                             |                   |                                                                      |
|                                  | Roxy Senior, MBBS, MD, DM                |                                             | Harrow            | Northwick Park Hospital Harrow/ Royal Brompton Hospital London (202) |
|                                  | Ahmed Elghamaz, MB BCh                   |                                             |                   |                                                                      |
|                                  | Sothinathan Gurunathan, MBChB            |                                             |                   |                                                                      |
|                                  | Nikolaos Karogiannis, MBBS               | Grace M. Young , MSc, BSc (Hons)            |                   |                                                                      |
|                                  | Benoy N Shah, MD, MBBS, BSc (Hons)       | Christopher Kinsey                          |                   |                                                                      |
|                                  | Richard HJ Trimlett, MBBS, CCST          | Raisa Kavalakkat, MSc, BSc, RN              |                   |                                                                      |
|                                  | Michael B Rubens, LRCP, MRCS, MBBS, DMRD | Jo Evans, RN                                |                   |                                                                      |
|                                  | Edward D Nicol, MD, BMedSci, MBBS, DTM&H | Ikraam Hassan, RN                           |                   |                                                                      |
|                                  | Tarun K Mittal, MD                       |                                             |                   |                                                                      |
|                                  | Reinette Hampson, BSc (Hons), BA (Hons)  |                                             |                   |                                                                      |
|                                  | Reto Andreas Gamma, MBBS                 | Sarah Williams, RN                          | Chelmsford        | Broomfield Hospital (39)                                             |
|                                  |                                          | Kim Holland, RN                             |                   |                                                                      |
|                                  |                                          | Karen Swan, RN                              |                   |                                                                      |
|                                  | Mark A de Belder, MD                     | Bev Atkinson, RN                            | Middlesbrough     | The James Cook University Hospital, Middlesbrough (37)               |
|                                  | Jeet Thambyrajah, MD                     |                                             |                   |                                                                      |
|                                  | Thuraia Nageh, BSc(Hons) MBBS MD MRCP    | Swapna Kunhunni, MRes Clin Res, BSc (N), RN | Westcliffe on Sea | Southend University Hospital (34)                                    |

|  |                                         |                                    |             |                                                          |
|--|-----------------------------------------|------------------------------------|-------------|----------------------------------------------------------|
|  | John R Davies, MBBS, PhD                |                                    |             |                                                          |
|  | Steven J. Lindsay, MD                   | Craig Atkinson, RN                 | Bradford    | Bradford Royal Infirmary (20)                            |
|  | John Kurian, MD                         | Carita Krannila, RN                |             |                                                          |
|  | Haqeel Jamil, MD                        | Manitha Vinod, RN                  |             |                                                          |
|  | Osama Raheem, MD                        |                                    |             |                                                          |
|  | Angela Hoye, MD                         | Lisa Chaytor                       | Cottingham  | The University of Hull/Castle Hill Hospital (19)         |
|  |                                         | Leanne Cox                         |             |                                                          |
|  |                                         | Julie Morrow                       |             |                                                          |
|  |                                         | Kay Rowe                           |             |                                                          |
|  | Patrick Donnelly, MD                    | Stephanie Kelly, RN                | Belfast     | South Eastern Health and Social Care (17)                |
|  | Bernardas Valecka, MD                   | Susan Regan, RN                    |             |                                                          |
|  |                                         | Dawn Turnbull                      |             |                                                          |
|  | Anoop Chauhan, MD                       | Catherine Fleming                  | Blackpool   | Blackpool Teaching Hospitals (16)                        |
|  |                                         | Arijit Ghosh                       |             |                                                          |
|  |                                         | Karen Gratrix                      |             |                                                          |
|  |                                         | Stephen Preston                    |             |                                                          |
|  | Craig Barr, MD                          | Anne Cartwright                    | Dudley      | Russells Hall Hospital (15)                              |
|  | Khaled Alfakih, MBBS, MD                | Abigail Knighton, BSc., PG Dip.    | London      | King's College NHS Foundation Hospital (14)              |
|  | Jonathan Byrne, PhD                     | Katherine Martin, RGN, Dip. N, MSc |             |                                                          |
|  | Ian Webb, PhD, MA                       |                                    |             |                                                          |
|  | Peter Henriksen, PhD, MB ChB, BSc(Hons) | Laura Flint, RGN                   | Edinburgh   | Royal Infirmary of Edinburgh (13)                        |
|  |                                         | James Harrison, BSc(Hons), PG dip  |             |                                                          |
|  | Peter OKane, MD                         | Nicki Lakeman                      | Bournemouth | Royal Bournemouth Hospital (13)                          |
|  |                                         | Anja Ljubez                        |             |                                                          |
|  | Ramesh de Silva, MB ChB, MD             |                                    | Bedford     | Bedford Hospital NHS Trust (11)                          |
|  | Dwayne S. G. Conway, MD                 | Judith Wright                      | Wakefield   | Pinderfields Hospital (11)                               |
|  |                                         | Donna Exley                        |             |                                                          |
|  | Alexander A Sirker, MB BChir, PhD       |                                    | London      | University College London Hospitals NHS Foundation Trust |
|  |                                         | Mervyn Andiapen, RN                |             |                                                          |
|  |                                         | Amy J. Richards, BSc               |             |                                                          |
|  |                                         |                                    |             |                                                          |
|  |                                         |                                    |             | (11)                                                     |
|  | Stephen P Hoole, MD                     | Lisa Wong, MSc                     | Cambridge   | Papworth Hospital (10)                                   |

|  |                                        |                         |              |                                                    |  |
|--|----------------------------------------|-------------------------|--------------|----------------------------------------------------|--|
|  | Fraser N. Witherow, MD                 | Melanie J. Munro, RGN   | Dorchester   | Dorset County Hospital (8)                         |  |
|  | Nicola Johnston, MB, Bch BAO, MRCP, MD |                         | Belfast      | Belfast Trust (7)                                  |  |
|  | Mark Harbinson, MB, Bch BAO, MRCP, MD  | Michelle McEvoy, RN     |              |                                                    |  |
|  | Simon Walsh, MB, Bch BAO, MD           | Caroline Brown, RN      |              |                                                    |  |
|  | Hanna Douglas, MB, Bch BAO, MRCP, MD   |                         |              |                                                    |  |
|  | Matthew Luckie, MD                     | Thabitha Charles        | Manchester   | Central Manchester University Hospital (7)         |  |
|  |                                        | Laurel Kolakaluri       |              |                                                    |  |
|  |                                        | Hannah Phillips         |              |                                                    |  |
|  | Jolanta Sobolewska, MD                 | Louise Morby, RN        | Oldham       | The Pennine Acute Hospitals NHS Trust (6)          |  |
|  |                                        | Karen Hallett, RN       |              |                                                    |  |
|  |                                        | Carolyn Corbett, RN     |              |                                                    |  |
|  |                                        | Lynne Winstanley        |              |                                                    |  |
|  | Paramjit Jeetley, MD                   | Angelique Smit, RN      | London       | Royal Free London NHS Foundation Trust (6)         |  |
|  | Niket Patel, MD                        |                         |              |                                                    |  |
|  | Tushar Kotecha, MBChB, Mpharm          |                         |              |                                                    |  |
|  | Christopher Travill, MBBS, MD          | Susan Gent, SRN RGN     | Luton        | Luton and Dunstable University Hospital NHS FT (5) |  |
|  | Iqbal Karimullah, MBBS                 | Nafisa Hussain, BSc     |              |                                                    |  |
|  | Mahmud Al-Bustami, MBBS                |                         |              |                                                    |  |
|  | Denise Braganza, MD                    | Fiona Haines            | Peterborough | Peterborough City Hospital (5)                     |  |
|  |                                        | Joanne Taaffe           |              |                                                    |  |
|  | Robert Henderson, MD                   | Jane Burton             | Nottingham   | Nottingham University Hospitals (4)                |  |
|  | Kate Pointon, MBBS                     | Maria Colton            |              |                                                    |  |
|  | Surendra Naik, PhD                     | Rachel King             |              |                                                    |  |
|  | Thomas Mathew, MBBS, MD, DM            |                         |              |                                                    |  |
|  |                                        | Ammani Brown, MSc BA RN | Clydebank    | University of Glasgow (4)                          |  |
|  |                                        | Andrew Docherty, RN     |              |                                                    |  |
|  | Colin Berry, BSc MB ChB, PhD           | Lisa McCloy, RN         |              |                                                    |  |
|  | Damien Collison, MB ChB                | Kate Robb, RN           |              |                                                    |  |
|  | Giles Roditi, MB ChB                   | Craig Paterson, PhD     |              |                                                    |  |
|  |                                        | Wenda Crawford, RN      |              |                                                    |  |
|  |                                        | Joanne Kelly, RN        |              |                                                    |  |
|  |                                        | Lorraine McGregor, RN   |              |                                                    |  |

|                        |                               |                        |                    |                                                           |
|------------------------|-------------------------------|------------------------|--------------------|-----------------------------------------------------------|
|                        | Andrew J Moriarty, BSc MB PhD | Anne Mackin, RN, BSc   | Craigavon          | Cardiovascular Research Unit, Craigavon Area Hospital (2) |
|                        | Jason D. Glover, MBBS         | Janet P Knight, RN     | Basingstoke        | Hampshire Hospitals NHS Foundation Trust (2)              |
|                        | Jiwan Pradhan, MBBS           |                        |                    |                                                           |
|                        | Ghada Mikhail, MD             | Tuhina Bose            | London             | Imperial College Healthcare NHS Trust (1)                 |
|                        | Darrel P. Francis, MD, MA     |                        |                    |                                                           |
| *Canada (447)          |                               |                        |                    |                                                           |
| Country Leaders        |                               |                        |                    |                                                           |
| Vladimir Dzavik, MD    |                               |                        |                    |                                                           |
| Shaun Goodman, MD, MSc |                               |                        |                    |                                                           |
| Gilbert Gosselin, MD   |                               |                        |                    |                                                           |
|                        | Gilbert Gosselin, MD          | Anna Proietti, RN      | Montreal, QC       | Montreal Heart Institute (90)                             |
|                        |                               | Myriam Brousseau, RN   |                    |                                                           |
|                        |                               | Magalie Corfias, RN    |                    |                                                           |
|                        |                               | Patricia Blaise        |                    |                                                           |
|                        |                               | Luc Harvey             |                    |                                                           |
|                        | Ariel Diaz, MD                |                        | Trois-Rivieres, QC | Centre Hospitalier de Regional Trois-Rivieres (71)        |
|                        | Philippe Rheault, MD          |                        |                    |                                                           |
|                        | Miguel Barrero, MD            |                        |                    |                                                           |
|                        | Carl-Éric Gagné, MD           | Patricia Alarie        |                    |                                                           |
|                        | Yanek Pépin-Dubois, MD        | Linda Arcand           |                    |                                                           |
|                        | Ricardo Costa, MD             | Isabelle Roy           |                    |                                                           |
|                        | Ying Tung Sia, MD             | Estelle Montpetit      |                    |                                                           |
|                        | Catherine Lemay, MD           |                        |                    |                                                           |
|                        | Alejandro Gisbert, MD         |                        |                    |                                                           |
|                        | Pierre Gervais, MD            |                        |                    |                                                           |
|                        | Alain Rheault, MD             |                        |                    |                                                           |
|                        |                               | Katia Drouin, RN       | Terrebonne, QC     | CISSSL - Hopital Pierre-Le Gardeur (42)                   |
|                        | Denis Carl Phaneuf, MD        | Christine Bergeron, RN |                    |                                                           |
|                        | Gilbert Gosselin, MD          | Christine Shelley      |                    |                                                           |
|                        |                               | Christine Masson       |                    |                                                           |
|                        | Pallav Garg, MBBS, MSc        | Sandy Carr, RN         | London, ON         | London Health Sciences Centre (35)                        |
|                        |                               | Catherine Bone, RN     |                    |                                                           |
|                        | Benjamin J.W. Chow, MD        | Ermina Moga            | Ottawa, ON         | University of Ottawa Heart Institute (29)                 |
|                        | Renee C. Hessian, MD          | Janetta Kourzenkova    |                    |                                                           |

|  |                                       |                                                                     |                  |                                     |
|--|---------------------------------------|---------------------------------------------------------------------|------------------|-------------------------------------|
|  | Rob S. Beanlands, MD                  | Olga Walter                                                         |                  |                                     |
|  | Richard F. Davies, MD                 |                                                                     |                  |                                     |
|  | Kevin R. Bainey, MD, MSc              | Norma Hogg, RN<br>Suzanne Welsh, RN                                 | Edmonton, AB     | University of Alberta (28)          |
|  | Asim N. Cheema, MD, PhD               |                                                                     | Toronto, ON      | St. Michael's Hospital (27)         |
|  | Akshay Bagai, MD, MHS                 |                                                                     |                  |                                     |
|  | Ron Wald, MDCM, MPH                   |                                                                     |                  |                                     |
|  | Shaun Goodman, MD, MSc                | Khrystyna Kushniriuk, HBSc, MD                                      |                  |                                     |
|  | John Joseph Graham, MRCP, MB ChB, BSc | Mohammed Hussain                                                    |                  |                                     |
|  | Mark Peterson, MD, FRCSC, PhD         | Olugbenga Bello                                                     |                  |                                     |
|  | Chi-Ming Chow, MD, CM, MSc            |                                                                     |                  |                                     |
|  | Beth Abramson, MD, MSc                |                                                                     |                  |                                     |
|  | Asim Nazir Cheema, MD                 | Ishba Syed, MBBS                                                    | Mississauga, ON  | Dixie Medical Group (24)            |
|  | Mohammad Tariq Vakani, MD             | Mohammed Hussain, BSc(H)<br>Khrystyna Kushniriuk, MBBS              |                  |                                     |
|  | James Cha, MD                         | Judy Otis, CRC<br>Rebecca Otis, CRC                                 | Oshawa, ON       | Dr. James Cha (21)                  |
|  | Andrew G Howarth, MD, PhD             | Michelle M Seib, RN<br>Sandra M Rivest, RN<br>Rosa Sandonato, BSCN  | Calgary, AB      | University of Calgary (15)          |
|  | Graham Wong, MD                       | Jackie Chow<br>Andrew Starovoytov<br>Naomi Uchida<br>Ngaire Meadows | Vancouver, BC    | Vancouver General Hospital (15)     |
|  | Amar Uxa, MD                          | Nadia Asif<br>Suzana Tavares                                        | Toronto, ON      | University Health Network (14)      |
|  | Paul Galiwango, MD                    | Bev Bozek, RN, CCRC                                                 | Scarborough, ON  | Scarborough Cardiology Research (9) |
|  | Saleem Kassam, MD                     | Maria Shier                                                         |                  |                                     |
|  | Ashok Mukherjee, MD                   | Lori-Ann Larmand                                                    |                  |                                     |
|  | A. Joseph Ricci, MD                   | Amir Janmohamed<br>Brenda Hart                                      |                  |                                     |
|  | Andy Lam, MD                          | Jane Marucci<br>Sharon Tai                                          | East Grimsby, ON | West Lincoln Memorial Hospital (8)  |
|  | Shamir Mehta, MD                      | Sonya Brons, RN                                                     | Hamilton, ON     |                                     |

|                                  |                                       |                                   |                    |                                                                              |
|----------------------------------|---------------------------------------|-----------------------------------|--------------------|------------------------------------------------------------------------------|
|                                  |                                       | Chris Beck, RN                    |                    | Hamilton General Hospital (7)                                                |
|                                  |                                       | Glenda Wong, RN                   |                    |                                                                              |
|                                  |                                       | Krystal Etherington               |                    |                                                                              |
|                                  |                                       | Thippeekaa Arumairajah            |                    |                                                                              |
|                                  | Jacob Udell, MD                       | Maria Aprile                      | Toronto, ON        | Women's College Hospital (7)                                                 |
|                                  |                                       | Sara Karlsson                     |                    |                                                                              |
|                                  |                                       | Susan Webber                      |                    |                                                                              |
|                                  | Philippe Généreux, MD                 | Chantale Mercure                  | Montréal, QC       | Centre Intégré Universitaire de Santé et de Services Sociaux du Montréal (2) |
|                                  | Adnan Hameed, MD                      | Nancy Aedy                        | St. Catharines, ON | Saint Catharines General Hospital (2)                                        |
|                                  | Ledjalem Daba, MD                     | Fran Farquharson                  | Vaughan, ON        | Northwest GTA Cardiovascular and Heart Rhythm Program (1)                    |
|                                  |                                       | Anam Siddiqui                     |                    |                                                                              |
| Brazil (399)                     |                                       |                                   |                    |                                                                              |
| Country Leaders                  |                                       |                                   |                    |                                                                              |
| Antonio Carlos Carvalho, MD, PhD |                                       |                                   |                    |                                                                              |
| Renato D. Lopes, MD, PhD         |                                       |                                   |                    |                                                                              |
|                                  | Whady Hueb, MD                        | Myrthes Emy Takiuti, RN           | Sao Paulo          | Heart Institute (InCor) University of São Paulo (127)                        |
|                                  | Paulo Cury Rezende, MD                |                                   |                    |                                                                              |
|                                  | Expedito Eustáquio Ribeiro Silva, MD  |                                   |                    |                                                                              |
|                                  | Alexandre Ciappina Hueb, MD           |                                   |                    |                                                                              |
|                                  | Paola Emanuela Poggio Smanio, MD, PhD | Leonardo Pizzol Caetano, PhD      | São Paulo          | Instituto Dante Pazzanese de Cardiologia (98)                                |
|                                  | Alexandre Schaan de Quadros, MD       |                                   | Porto Alegre       | Instituto de Cardiologia de Porto Alegre (41)                                |
|                                  | Renato Abdala Karam Kalil, MD         | Aline Peixoto Deiro               |                    |                                                                              |
|                                  | José Luiz da Costa Vieira, MD         | Alice Manica Muller               |                    |                                                                              |
|                                  | Gabriel Grossmann, MD                 | Maria Antonieta Pereira de Moraes |                    |                                                                              |
|                                  | Pedro Píccaro de Oliveira, MD         | Bruna Maria Ascoli                |                    |                                                                              |
|                                  | Leonardo Bridi, MD                    | Sílvia Zottis Poletti             |                    |                                                                              |
|                                  | Simone Savaris, MD                    |                                   |                    |                                                                              |
|                                  | João V Vitola, MD, PhD                |                                   |                    |                                                                              |
|                                  | Rodrigo J Cerci, MD, Msc              | Sandra S. Zier, BSc               |                    |                                                                              |
|                                  | Fabio R Farias, MD, Msc               | Vilmar Veiga Jr, BSc              |                    |                                                                              |

|  |                                        |                               |                 |                                                                                                    |
|--|----------------------------------------|-------------------------------|-----------------|----------------------------------------------------------------------------------------------------|
|  | Miguel M Fernandes, MD, PhD            |                               |                 |                                                                                                    |
|  | José Antonio Marin-Neto, MD, PhD       |                               | Ribeirao Preto  | Hospital das Clinicas da Faculdade de Medicina de Ribeirão Preto da Universidade de São Paulo (31) |
|  | André Schmidt, MD, PhD                 |                               |                 |                                                                                                    |
|  | Moysés de Oliveira Lima Filho, MD, PhD | Diego Franca da Cunha         |                 |                                                                                                    |
|  | Ricardo Mendes Oliveira, MD            |                               |                 |                                                                                                    |
|  | João Reynaldo Abbud Chierice, MD       |                               |                 |                                                                                                    |
|  | Carisi A. Polanczyk, MD                | Guilherme G Rucatti, PsyD     | Porto Alegre    | Hospital de Clínicas de Porto Alegre (12)                                                          |
|  | Mariana V. Furtado, MD                 | Fernanda Igansi, BSc          |                 |                                                                                                    |
|  | Luis F. Smidt, MD                      | Mauren P Haeffner, BSc        |                 |                                                                                                    |
|  | Antonio Carlos Carvalho, MD            | Viviane Almeida               | Sao Paulo       | Unifesp - Hospital Sao Paulo (9)                                                                   |
|  | Gustavo Pucci, MD                      | Gabriela Sanchez de Souza     |                 |                                                                                                    |
|  | Flavio Lyra, MD                        |                               |                 |                                                                                                    |
|  | Alvaro Rabelo Alves Junior, MD         | Mayana Almeida                | Salvador        | Fundacao Bahiana de Cardiologia (9)                                                                |
|  |                                        | Viviane dos Santos            |                 |                                                                                                    |
|  | Marianna D. A. Dracoulakis, MD, PhD    | Natalia S Oliveira, RN        | Salvador        | Hospital da Bahia (8)                                                                              |
|  | Rodolfo G. S. D Lima, MD               |                               |                 |                                                                                                    |
|  | Estevao Figueiredo, MD                 | Bruna Edilena Paulino Azevedo | Belo Horizonte  | Hospital Lifecenter (8)                                                                            |
|  | Paulo Ricardo Caramori, MD             | Marco Bizzaro Santos          | Porto Alegre    | Hospital Sao Lucas da Pontificia Universidade Catolica do Rio Grande do Sol (7)                    |
|  |                                        | Amanda Germann                |                 |                                                                                                    |
|  |                                        | Vitor Gomes                   |                 |                                                                                                    |
|  |                                        | Rosa Homem                    |                 |                                                                                                    |
|  |                                        | Ellen Magedanz                |                 |                                                                                                    |
|  | Rogerio Tumelero, MD                   | Rosane Laimer                 | Fundo           | Hospital Sao Vicente de Paulo (5)                                                                  |
|  |                                        | Alexandre Tognon              |                 |                                                                                                    |
|  | Frederico Dall'Orto, MD                |                               | Pocos de Caldas | Hospital Maternidade e Pronto Socorro Santa Lucia (4)                                              |
|  | Claudio T. Mesquita, MD                | Roberta P Santos, RN          | Botafogo        | Hospital Pró-Cardíaco (3)                                                                          |
|  | Alexandre S. Colafranceschi, MD        |                               |                 |                                                                                                    |
|  |                                        |                               |                 |                                                                                                    |
|  | Amarino C. Oliveira Jr., MD            |                               |                 |                                                                                                    |
|  | Luiz A. Carvalho, MD                   |                               |                 |                                                                                                    |

|                          |                                               |                               |           |                                                                                  |
|--------------------------|-----------------------------------------------|-------------------------------|-----------|----------------------------------------------------------------------------------|
|                          | Isabella C. Palazzo, MD                       |                               |           |                                                                                  |
|                          | Andre S. Sousa, MD                            |                               |           |                                                                                  |
|                          | Expedito Eustáquio Ribeiro da Silva, MD, PhD  |                               | Sao Paulo | Hospital TotalCor (2)                                                            |
|                          | Pedro Gabriel Melo de Barros e Silva, MD, PhD | Mariana Yumi Okada, RN        |           |                                                                                  |
|                          | Luciana de Pádua Silva Baptista, MD, PhD      | Ana Paula Batista, RN         |           |                                                                                  |
|                          | Marcelo Jamus Rodrigues, MD                   | Aline Nogueira Rabaça, BS     |           |                                                                                  |
|                          | Marcos Valério Coimbra de Resende, MD, PhD    |                               |           |                                                                                  |
|                          | Jose Francisco Saraiva, MD                    | Larissa Miranda Trama         | Sao Paulo | Hospital Celso Pierro (1)                                                        |
|                          |                                               | Talita Silva                  |           |                                                                                  |
|                          |                                               | Camila Thais de Souza Ormundo |           |                                                                                  |
|                          |                                               | Carla Vicente                 |           |                                                                                  |
|                          | Costantino Costantini, MD, PhD                | Caroline Pinheiro             | Curitiba  | Hospital Cardiologico Costantini (1)                                             |
|                          |                                               | Daniele Komar                 |           |                                                                                  |
| Poland (333)             |                                               |                               |           |                                                                                  |
| Country Leaders          |                                               |                               |           |                                                                                  |
| Witold Ruzyllo, MD       |                                               |                               |           |                                                                                  |
| Hanna Szwed, MD, PhD     |                                               |                               |           |                                                                                  |
| Country Coordinator      |                                               |                               |           |                                                                                  |
| Radoslaw Pracon, MD, PhD |                                               |                               |           |                                                                                  |
|                          | Marcin Demkow, MD, PhD                        |                               | Warsaw    | Coronary and Structural Heart Diseases Department, Institute of Cardiology (127) |
|                          | Radoslaw Pracon, MD, PhD                      |                               |           |                                                                                  |
|                          | Cezary Kepka, MD PhD                          |                               |           |                                                                                  |
|                          | Anna Teresinska, MD PhD                       | Olga Walesiak                 |           |                                                                                  |
|                          | Karolina Kryczka, MD PhD                      | Katarzyna Malinowska          |           |                                                                                  |
|                          | Jan Henzel, MD PhD                            |                               |           |                                                                                  |
|                          | Mateusz Solecki, MD PhD                       |                               |           |                                                                                  |
|                          | Edyta Kaczmarska, MD PhD                      |                               |           |                                                                                  |
|                          | Tomasz Mazurek, MD, PhD                       | Jakub Maksym, MD              | Warszawa  | Medical University of Warsaw (48)                                                |
|                          |                                               | Karolina Wojtera, MD          |           |                                                                                  |
|                          |                                               | Anna Fojt, MD                 |           |                                                                                  |

|  |                                         |                        |        |                                                                                   |
|--|-----------------------------------------|------------------------|--------|-----------------------------------------------------------------------------------|
|  |                                         | Ewa Szczerba, MD       |        |                                                                                   |
|  | Jaroslaw Drozd, PhD                     |                        | Lodz   | Cardiology Clinic, Medical University in Lodz (43)                                |
|  | Bartosz Czarniak, MD                    |                        |        |                                                                                   |
|  | Malgorzata Frach (formerly Stasiak), MD |                        |        |                                                                                   |
|  | Konrad Szymczyk, MD                     |                        |        |                                                                                   |
|  | Iwona Niedzwiecka, MD                   |                        |        |                                                                                   |
|  | Sebastian Sobczak, MD                   |                        |        |                                                                                   |
|  | Tomasz Ciurus, MD                       |                        |        |                                                                                   |
|  | Piotr Jakubowski, MD                    |                        |        |                                                                                   |
|  | Magdalena Misztal-Teodorczyk, MD        |                        |        |                                                                                   |
|  | Dawid Teodorczyk, MD                    | Marta Swiderek, MA     |        |                                                                                   |
|  | Aleksandra Fraczak, MD                  | Ewelina Wojtala, MA    |        |                                                                                   |
|  | Marcin Szkopiak, MD                     |                        |        |                                                                                   |
|  | Patrycja Lebioda, MD                    |                        |        |                                                                                   |
|  | Michal Wlodarczyk, MD                   |                        |        |                                                                                   |
|  | Anna Plachcinska, MD                    |                        |        |                                                                                   |
|  | Jacek Kusmierk, MD                      |                        |        |                                                                                   |
|  | Magdalena Miller, MD                    |                        |        |                                                                                   |
|  | Halina Marciniak, MD                    |                        |        |                                                                                   |
|  | Karolina Wojtczak-Soska, MD             |                        |        |                                                                                   |
|  | Katarzyna Łuczak, MD                    |                        |        |                                                                                   |
|  | Tomasz Tarchalski, MD                   |                        |        |                                                                                   |
|  | Anna Cichocka-Radwan, MD                |                        |        |                                                                                   |
|  | Hanna Szwed, MD, PhD                    | Jaroslaw Karwowski, MD | Warsaw | Institute of Cardiology, Warsaw (35)                                              |
|  | Grazyna Anna Szulczyk, MD               |                        |        |                                                                                   |
|  | Adam Witkowski, MD, PhD                 |                        | Warsaw | Department of Interventional Cardiology & Angiology, Institute of Cardiology (20) |
|  | Krzysztof Kukuła, MD, PhD               |                        |        |                                                                                   |
|  | Małgorzata Celińska-Spodar, MD          |                        |        |                                                                                   |

|                        |                                    |                                 |             |                                                                                                                                                                                                  |  |
|------------------------|------------------------------------|---------------------------------|-------------|--------------------------------------------------------------------------------------------------------------------------------------------------------------------------------------------------|--|
|                        | Joanna Zalewska, MD                |                                 |             |                                                                                                                                                                                                  |  |
|                        | Grzegorz Gajos, MD, PhD            |                                 | Krakow      | Department of Coronary Disease, John Paul II Hospital, Jagiellonian University Medical College (16)                                                                                              |  |
|                        | Krzysztof Bury, MD, PhD            |                                 |             |                                                                                                                                                                                                  |  |
|                        | Piotr Pruszczyk, MD, PhD           | Andrzej Łabyk, MD               | Warszawa    | Department of Internal Medicine and Cardiology, Infant Jesus Teaching Hospital, Medical University of Warsaw (15)                                                                                |  |
|                        | Marek Roik, MD, PhD                | Agnieszka Szramowska, MD        |             |                                                                                                                                                                                                  |  |
|                        |                                    | Olga Zdończyk, MD               |             |                                                                                                                                                                                                  |  |
|                        | Krystyna Łoboz-Grudzień, MD, PhD   | Joanna Jaroch, MD, PhD          | Wrocław     | T.Marciniak Hospital (11)                                                                                                                                                                        |  |
|                        | Leszek Sokalski, MD, PhD           |                                 |             |                                                                                                                                                                                                  |  |
|                        | Barbara Brzezińska, MD, PhD        |                                 |             |                                                                                                                                                                                                  |  |
|                        | Maciej Lesiak, Professor, MD       |                                 | Poznan      | Szpital Kliniczny Przemienienia Pańskiego (10)                                                                                                                                                   |  |
|                        | Magdalena Łanocha, MD              |                                 |             |                                                                                                                                                                                                  |  |
|                        | Krzysztof W. Reczuch, MD           | Adam Kolodziej, MD              | Wroclaw     | Military Hospital / Medical University (4)                                                                                                                                                       |  |
|                        | Zbigniew Kalarus, MD               |                                 | Zabrze      | Medical University of Silesia, School of Medicine with the Division of Dentistry, Department of Cardiology, Congenital Heart Diseases and Electrotherapy, Silesian Center for Heart Diseases (3) |  |
|                        | Andrzej Swiatkowski, MD            |                                 |             |                                                                                                                                                                                                  |  |
|                        | Mariola Szulik, MD                 |                                 |             |                                                                                                                                                                                                  |  |
|                        | Włodzimierz J. Musiał, MD          | Marta Marcinkiewicz-Siemion, MD | Bialystok   | University Hospital in Bialystok (1)                                                                                                                                                             |  |
| Russia (303)           |                                    |                                 |             |                                                                                                                                                                                                  |  |
| Country Coordinator    |                                    |                                 |             |                                                                                                                                                                                                  |  |
| Olga Bockeria, MD, PhD |                                    |                                 |             |                                                                                                                                                                                                  |  |
|                        | Leo Bockeria, MD, PhD              | Olga Bockeria, MD, PhD          | Moscow      | National Medical Research Center for Cardiovascular Surgery (113)                                                                                                                                |  |
|                        | Karen Petrosyan, MD, PhD           | Zalina Kudzoeva, MD             |             |                                                                                                                                                                                                  |  |
|                        | Tatiana Trifonova, MD              | Nodira Aripova, MD              |             |                                                                                                                                                                                                  |  |
|                        | Alexander M. Chernyavskiy, MD, PhD | Ivan A. Naryshkin, MD           | Novosibirsk | E.Meshalkin National Medical Research Center of the Ministry of Health of the Russian Federation (101)                                                                                           |  |
|                        | Evgeniy I. Kretov, MD              | Alena Kuleshova, MD             |             |                                                                                                                                                                                                  |  |
|                        | Igor O. Grazhdankin, MD            | Dastan Malaev, MD               |             |                                                                                                                                                                                                  |  |

|                                 |                                       |                                   |                        |                                                                                                                                                        |  |
|---------------------------------|---------------------------------------|-----------------------------------|------------------------|--------------------------------------------------------------------------------------------------------------------------------------------------------|--|
|                                 | Leonid L. Bershtein, MD, PhD          |                                   | Saint Petersburg       | North-Western State Medical University (50)                                                                                                            |  |
|                                 | Sergey A. Sayganov, MD, PhD           | Irina Subbotina                   |                        |                                                                                                                                                        |  |
|                                 | Anastasia M. Kuzmina-Krutetskaya, MD  | Victoria Gumerova                 |                        |                                                                                                                                                        |  |
|                                 | Elizaveta V. Zbyshevskaya, MD, PhD    |                                   |                        |                                                                                                                                                        |  |
|                                 | Nana O. Katamadze, MD, PhD            |                                   |                        |                                                                                                                                                        |  |
|                                 | Elena A. Demchenko, MD, PhD           | Olga B. Nikolaeva, MD             | Saint Petersburg       | Federal Almazov North-West Medical Research Centre (39)                                                                                                |  |
|                                 | Pavel S. Kozlov, MD                   |                                   |                        |                                                                                                                                                        |  |
|                                 | Vikentiy Y. Kozulin, MD               |                                   |                        |                                                                                                                                                        |  |
|                                 | Ekaterina I. Lubinskaya, MD           |                                   |                        |                                                                                                                                                        |  |
| *Spain (286)                    |                                       |                                   |                        |                                                                                                                                                        |  |
| Country Leader                  |                                       |                                   |                        |                                                                                                                                                        |  |
| Jose Luis Lopez-Sendon, MD, PhD |                                       |                                   |                        |                                                                                                                                                        |  |
| Country Coordinator             |                                       |                                   |                        |                                                                                                                                                        |  |
| Almudena Castro, MD             |                                       |                                   |                        |                                                                                                                                                        |  |
|                                 | Jose Lopez-Sendon, MD, PhD            | Virginia Fernández-Figares, Pharm | Madrid                 | Hospital La Paz. IdiPaz (118)                                                                                                                          |  |
|                                 | Almudena Castro, MD                   |                                   |                        |                                                                                                                                                        |  |
|                                 | Elena Refoyo Salicio, MD              |                                   |                        |                                                                                                                                                        |  |
|                                 | Gabriela Guzman, MD                   |                                   |                        |                                                                                                                                                        |  |
|                                 | Gabriel Galeote, MD                   |                                   |                        |                                                                                                                                                        |  |
|                                 | Silvia Valbuena, MD                   |                                   |                        |                                                                                                                                                        |  |
|                                 | Jesús Peteiro, MD, PhD                |                                   | A Coruna               | Complejo Hospitalario Universitario A Coruña (CHUAC) Sergas, Department of Cardiology. INIBIC A Coruña. CIBER-CV. Universidad de A Coruña, Spain (112) |  |
|                                 | María Dolores Martínez-Ruiz, MD       |                                   |                        |                                                                                                                                                        |  |
|                                 | Ruth Pérez-Fernández, MD              | Moisés Blanco-Calvo, PhD          |                        |                                                                                                                                                        |  |
|                                 | José J Cuenca-Castillo, MD            | Encarnación Alonso-Álvarez, BSc   |                        |                                                                                                                                                        |  |
|                                 | Xacobe Flores-Ríos, MD                | Paula García-González, BSc        |                        |                                                                                                                                                        |  |
|                                 | Óscar Prada-Delgado, MD               |                                   |                        |                                                                                                                                                        |  |
|                                 | Gonzalo Barge-Caballero, MD           |                                   |                        |                                                                                                                                                        |  |
|                                 | Jose Ramon Gonzalez Juanatey, MD, PhD | Jose Seijas Amigo, Pharm          | Santiago de Compostela | Hospital Clinico Universitario de Santiago (17)                                                                                                        |  |
|                                 | Miguel Souto Bayarri, MD, PhD         |                                   |                        |                                                                                                                                                        |  |

|                |                                    |                             |           |                                                                |
|----------------|------------------------------------|-----------------------------|-----------|----------------------------------------------------------------|
|                | Virginia Pubull Nuñez, MD          |                             |           |                                                                |
|                | Raymundo Ocaranza Sanchez, MD, PhD |                             |           |                                                                |
|                | Belen Cid Alvarez, MD              |                             |           |                                                                |
|                | Carlos Peña Gil, MD, PhD           |                             |           |                                                                |
|                | Amparo Martinez Monzonis, MD       |                             |           |                                                                |
|                | Alessandro Sionis, MD              | Ana Fernández Martínez, RN  | Barcelona | Hospital de la Santa Creu i Sant Pau (11)                      |
|                | Montserrat Vila Perales, MD        |                             |           |                                                                |
|                | Josep Maria Padró, MD              |                             |           |                                                                |
|                | Antonio Serra Peñaranda, MD        |                             |           |                                                                |
|                | Joan García Picart, MD             |                             |           |                                                                |
|                | Antonino Ginel Iglesias, MD        |                             |           |                                                                |
|                | Xavier Garcia-Moll Marimon, MD     |                             |           |                                                                |
|                | Guillem Pons Lladó, MD             |                             |           |                                                                |
|                | Francesc Carreras Costa, MD        |                             |           |                                                                |
|                | Vicente Miro, MD                   | Begoña Igual, MD            | Valencia  | Hospital Universitario y Politecnico La Fe (10)                |
|                | Jose L Diez, MD                    |                             |           |                                                                |
|                | Pilar Calvillo, MD                 |                             |           |                                                                |
|                | F. Marin Ortuño, MD, PhD           |                             | Murcia    | HUVA, Hospital Clínico Universitario Virgen De La Arrixaca (8) |
|                | M. Valdés Chávarri, MD, PhD        | M. Quintana Giner, MD       |           |                                                                |
|                | A. Tello Montolliu, MD, PhD        | A.I. Romero Anierte, MD     |           |                                                                |
|                | E. Pinar Bermudez, MD, PhD         | JM. Rivera Caravaca, MD     |           |                                                                |
|                | G. De La Morena, MD, PhD           |                             |           |                                                                |
|                | Montserrat Gracida Blancas, MD     | Olga Cañavate               | Barcelona | Hospital De Bellvitge (4)                                      |
|                |                                    | Sonia Guerrero              |           |                                                                |
|                |                                    | Silvia Riera                |           |                                                                |
|                | Jose Enrique Castillo Luena, MD    | Jose Enrique Castillo Luena | Zaragoza  | Hospital Universitario Miguel Servet (4)                       |
|                |                                    | Maria Lasala                |           |                                                                |
|                | Francisco Fernandez-Aviles, MD     | Maria Lorenzo               | Madrid    | Hospital General Universitario Gregorio Maranon (2)            |
|                |                                    | Olga Sobrino                |           |                                                                |
|                |                                    | Alexandra Vazquez           |           |                                                                |
| China (246)    |                                    |                             |           |                                                                |
| Country Leader |                                    |                             |           |                                                                |

|                      |                      |                  |           |                                                               |  |
|----------------------|----------------------|------------------|-----------|---------------------------------------------------------------|--|
| Lixin Jiang, MD, PhD |                      |                  |           |                                                               |  |
|                      | Jiyan Chen, MD       | Haojian Dong     | Guangzhou | Guangdong General Hospital (102)                              |  |
|                      |                      | Peiyu He         |           |                                                               |  |
|                      |                      | Chunli Xia       |           |                                                               |  |
|                      |                      | Junqing Yang     |           |                                                               |  |
|                      |                      | Qi Zhong         |           |                                                               |  |
|                      | Yongjian Wu, MD, PhD | Yanmeng Tian, MD | Beijing   | Chinese Academy of Medical Sciences, Fuwai Hospital (17)      |  |
|                      |                      | Dongze Li        | Urumqi    | First Affiliated Hospital of Xinjiang Medical University (15) |  |
|                      | Yitong Ma, MD        | Xiaomei Li       |           |                                                               |  |
|                      | Yining Yang, MD      | Xiang Ma         |           |                                                               |  |
|                      |                      | Zixiang Yu       |           |                                                               |  |
|                      |                      | Qian Zhao        |           |                                                               |  |
|                      | Zheng Ji, MD         | Chunguang Li     | Tangshan  | Tangshan Gongren Hospital (15)                                |  |
|                      |                      | Lei Zhang        |           |                                                               |  |
|                      |                      | Yu Zhao          |           |                                                               |  |
|                      |                      | Bolin Zhu        |           |                                                               |  |
|                      | Xinchun Yang, MD     | Mulei Chen       | Beijing   | Beijing Chao-yang Hospital, Capital Medical University (12)   |  |
|                      |                      | Hongjie Chi      |           |                                                               |  |
|                      |                      | Yang Wang        |           |                                                               |  |
|                      |                      | Jing Zhang       |           |                                                               |  |
|                      | Wenhua Lin, MD       | Rui Jing         | Tianjing  | TEDA International Cardiovascular Hospital (12)               |  |
|                      |                      | Jingjing Liu     |           |                                                               |  |
|                      | Hesong Zeng, MD      | Qiang Zhou, MD   | Wuhan     | Tongji Medical College (11)                                   |  |
|                      |                      | Chang Xu, MD     |           |                                                               |  |
|                      |                      | Zhuxi Li, MD     |           |                                                               |  |
|                      |                      | Junhua Li, MD    |           |                                                               |  |
|                      |                      | Luyang Xiong, MD |           |                                                               |  |
|                      | Xin Fu, MD           | Dan Gao          | Zhengzhou | The First Affiliated Hospital of Zhengzhou University (11)    |  |
|                      |                      | Dengke Jiang     |           |                                                               |  |
|                      |                      | Ran Leng         |           |                                                               |  |
|                      |                      | Xutong Wang      |           |                                                               |  |
|                      |                      | Qianqian Yuan    |           |                                                               |  |
|                      |                      | Lili Zhang       |           |                                                               |  |
|                      | Bin Yang, MD         | Ziliang Bai      | Taiyuan   | Shanxi Cardiovascular Hospital (10)                           |  |
|                      |                      | Jianhua Li       |           |                                                               |  |
|                      |                      | Jie Qi           |           |                                                               |  |
|                      |                      | Fei Wang         |           |                                                               |  |
|                      |                      | Haitao Wang      |           |                                                               |  |
|                      |                      | Bin Yang         |           |                                                               |  |
|                      |                      | Zhou Yue         |           |                                                               |  |
|                      |                      | Zhulin Zhang     |           |                                                               |  |

|                      |                        |                        |           |                                                                                        |  |
|----------------------|------------------------|------------------------|-----------|----------------------------------------------------------------------------------------|--|
|                      | Songtao Wang, MD       | Yumei Dong             | Qingdao   | Qingdao Fuwai Hospital (8)                                                             |  |
|                      |                        | Jiajia Mao             |           |                                                                                        |  |
|                      |                        | Bin Zhang              |           |                                                                                        |  |
|                      | Gong Cheng, MD         | Xiuhong Li             | Xian      | Shanxi Provincial People's Hospital (6)                                                |  |
|                      |                        | Xiaowei Yao            |           |                                                                                        |  |
|                      |                        | Nier Zhong             |           |                                                                                        |  |
|                      |                        | Ning Zhou              |           |                                                                                        |  |
|                      | Yulan Zhao, MD         | Yaping Huang, MS       | Zhengzhou | The Second Affiliated Hospital of Zhengzhou University (6)                             |  |
|                      |                        | Panpan Zhou, MS        |           |                                                                                        |  |
|                      | Xuehua Fang, MD        | Wei Su                 | Beijing   | Liangxiang Hospital, Beijing Fangshan District (6)                                     |  |
|                      | Qiutang Zeng, MD       | Yu Kunwu               | Wuhan     | Wuhan Union Hospital, Tongji Medical College, Huazhong Science and Tech University (3) |  |
|                      |                        | Yudong Peng            |           |                                                                                        |  |
|                      |                        | Xin Su                 |           |                                                                                        |  |
|                      | Xi Su, MD              | Chen Wang              | Wuhan     | Wuhan Asia Heart Hospital (3)                                                          |  |
|                      |                        | Yunhai Zhao            |           |                                                                                        |  |
|                      | Qingxian Li, MD        | Yaming Geng            | Jining    | Affiliated Hospital of Jining Medical University (3)                                   |  |
|                      |                        | Yanfu Wang             |           |                                                                                        |  |
|                      | Shao-ping Nie, MD, PhD | Jing-yao Fan, MD       | Beijing   | Beijing Anzhen Hospital (2)                                                            |  |
|                      |                        | Si-ting Feng, MD, PhD  |           |                                                                                        |  |
|                      |                        | Xiao Wang, MD, PhD     |           |                                                                                        |  |
|                      |                        | Yan Yan, MD, PhD       |           |                                                                                        |  |
|                      |                        | Hui-min Zhang, MD, PhD |           |                                                                                        |  |
|                      | Qin Yu, MD             | Lingping Chi           | Dalian    | Affiliated Zhongshan Hospital of Dalian University (2)                                 |  |
|                      |                        | Fang Liu               |           |                                                                                        |  |
|                      | Jian'an Wang, MD       | Han Chen               | Hangzhou  | The Second Affiliated Hospital Zhejiang University School of Medicine (1)              |  |
|                      |                        | Jun Jiang              |           |                                                                                        |  |
|                      |                        | Huajun Li              |           |                                                                                        |  |
|                      |                        | Jian'an Wang           |           |                                                                                        |  |
|                      |                        | Yechen Han, MM         | Beijing   | Peking Union Medical College Hospital (1)                                              |  |
|                      |                        | Lihong Xu, RN          |           |                                                                                        |  |
|                      | Shuyang Zhang, MD, PhD | Zhenyu Liu             |           |                                                                                        |  |
|                      | Zhenyu Liu, MD         | Gang Chen              |           |                                                                                        |  |
|                      |                        | Rongrong Hu            |           |                                                                                        |  |
| *Italy (139)         |                        |                        |           |                                                                                        |  |
| Country Leader       |                        |                        |           |                                                                                        |  |
| Aldo P. Maggioni, MD |                        |                        |           |                                                                                        |  |
|                      |                        |                        |           |                                                                                        |  |

|                          |                        |                          |                      |                                                                                           |  |
|--------------------------|------------------------|--------------------------|----------------------|-------------------------------------------------------------------------------------------|--|
|                          | Gian Piero Perna, MD   | Francesca Pietrucci, PhD | Ancona               | Cardiology and CCU - Ospedali Riuniti Ancona (54)                                         |  |
|                          | Marco Marini, MD       |                          |                      |                                                                                           |  |
|                          | Gabriele Gabrielli, MD |                          |                      |                                                                                           |  |
|                          | Stefano Provasoli, MD  | Anna Di Donato           | Varese               | Ospedale di Circolo e Fondazione Macchi (23)                                              |  |
|                          | Edoardo Verna, MD      |                          |                      |                                                                                           |  |
|                          | Lorenzo Monti, MD      |                          | Rozzano              | Humanitas Research Hospital, Rozzano (MI) (17)                                            |  |
|                          | Barbara Nardi, MD      |                          |                      |                                                                                           |  |
|                          | Antonio Di Chiara, MD  | Francesca Pezzetta, MD   | Tolmezzo             | Azienda Servizi Sanitaria n.3 Alto Friuli-Collinare-Medio Friuli (9)                      |  |
|                          | Andrea Mortara, MD     | Valentina Casali, MD     | Monza                | Policlinico di Monza, Monza MB (8)                                                        |  |
|                          | Marcello Galvani, MD   | Chiara Attanasio         | Forli                | Ospedale "G.B. Morgagni – L. Pierantoni" Forli (AUSL della Romagna) (8)                   |  |
|                          | Filippo Ottani, MD     |                          |                      |                                                                                           |  |
|                          | Marco Sicuro, MD       | Gianpiero Leone, MD      | Aosta                | Ospedale Regionale Umberto Parini (5)                                                     |  |
|                          |                        | Francesco Pisano, MD     |                      |                                                                                           |  |
|                          |                        | Cristina Bare, BSc       |                      |                                                                                           |  |
|                          | Paolo Calabro, MD      | Fabio Fimiani            | Napoli               | AORN Dei Colli "V. Monaldi" UOC Cardiologia Università della Campania "L. Vanvitelli" (4) |  |
|                          | Tiziana Formisano, MD  |                          |                      |                                                                                           |  |
|                          | Giuseppe Tarantini, MD | Alberto Barioli, MD      | Padua                | University of Padua-Cardiology Clinic (3)                                                 |  |
|                          | Umberto Cucchini, MD   | Federica Ramani          |                      |                                                                                           |  |
|                          | Anto Luigi Andres, MD  |                          |                      |                                                                                           |  |
|                          | Emanuela Racca, MD     | Fabrizio Rolfo, MD       | Cuneo                | Azienda Ospedaliera S. Croce e Carle (3)                                                  |  |
|                          |                        | Cecilia Goletto          |                      |                                                                                           |  |
|                          | Carlo Briguori, MD     | Francesca De Micco       | Naples               | Clinica Mediterranea (2)                                                                  |  |
|                          | Roberto Amati, MD      | Stefano Di Marco, MD     | Pescia               | UO Cardiologia Ospedale SS Cosma e Damiano (2)                                            |  |
|                          | William Vergoni, MD    | Martina Tricoli          |                      |                                                                                           |  |
|                          | Aldo Russo, MD         | Massimo Villella, MD     | San Giovanni Rotondo | IRCCS "Casa Sollievo della Sofferenza" (1)                                                |  |
|                          | Raffaele Fanelli, MD   |                          |                      |                                                                                           |  |
| *Singapore (61)          |                        |                          |                      |                                                                                           |  |
| Country Leader           |                        |                          |                      |                                                                                           |  |
| Harvey Douglas White, MD |                        |                          |                      |                                                                                           |  |

|                     |                         |                          |           |                                                 |
|---------------------|-------------------------|--------------------------|-----------|-------------------------------------------------|
| Country Coordinator |                         |                          |           |                                                 |
| Caroline Alweiler   |                         |                          |           |                                                 |
|                     | Kian-Keong Poh, MD      |                          | Singapore | National University Heart Center Singapore (33) |
|                     | Ping Chai, MD           |                          |           |                                                 |
|                     | Titus Lau, MD           |                          |           |                                                 |
|                     | Joshua P. Loh, MD       |                          |           |                                                 |
|                     | Edgar L. Tay, MD        |                          |           |                                                 |
|                     | Kristine Teoh, MD       | Sik-Yin V Tan, BSc       |           |                                                 |
|                     | Lynette L. Teo, MD      | Winnie C Sia, BSc        |           |                                                 |
|                     | Ching-Ching Ong, MD     | Audrey W Leong, BSc      |           |                                                 |
|                     | Raymond C. Wong, MD     |                          |           |                                                 |
|                     | Poay-Huan Loh, MD       |                          |           |                                                 |
|                     | Theodoros Kofidis, MD   |                          |           |                                                 |
|                     | Wan Xian Chan, MD       |                          |           |                                                 |
|                     | Koo Hui Chan, MD        |                          |           |                                                 |
|                     | David Foo, MBBS         | Li Hai Yan, RN           | Singapore | Tan Tock Seng Hospital (22)                     |
|                     | Jason Loh Kwok Kong, MD |                          |           |                                                 |
|                     | Ching Min Er, MD        |                          |           |                                                 |
|                     | Fahim Haider Jafary, MD |                          |           |                                                 |
|                     | Terrance Chua, MD       | Nasrul Ismail            | Singapore | National Heart Centre Singapore (6)             |
|                     |                         | Min Tun Kyaw             |           |                                                 |
|                     |                         | Deborah Yip              |           |                                                 |
| Germany (54)        |                         |                          |           |                                                 |
| Country Leader      |                         |                          |           |                                                 |
| Rolf Doerr, MD      |                         |                          |           |                                                 |
|                     | Rolf Doerr, MD          |                          | Dresden   | Praxisklinik Herz und Gefaesse (29)             |
|                     | Juergen Stumpf, MD      | Dorit Grahl              |           |                                                 |
|                     | Klaus Matschke, MD, PhD | Franziska Guenther       |           |                                                 |
|                     | Gregor Simonis, MD, PhD | Kerstin Bonin            |           |                                                 |
|                     | Clemens T. Kadalie, MD  |                          |           |                                                 |
|                     | Udo Sechtem, MD         | Ina Wenzelburger         | Stuttgart | Robert-Bosch-Krankenhaus (22)                   |
|                     | Peter Ong, MD           | Susanne Gruensfelder, RN |           |                                                 |

|                             |                               |                                    |          |                                                            |
|-----------------------------|-------------------------------|------------------------------------|----------|------------------------------------------------------------|
|                             | P. Christian Schulze, MD, PhD |                                    | Jena     | University Hospital Jena (2)                               |
|                             | Bjoern Goebel, MD             |                                    |          |                                                            |
|                             | Karsten Lenk, MD              |                                    |          |                                                            |
|                             | Georg Nickenig, MD            | Jan-Malte Sinning, MD              | Bonn     | Universitätsklinikum Bonn (1)                              |
|                             |                               | Marcel Weber, MD                   |          |                                                            |
|                             |                               | Nikos Werner, MD                   |          |                                                            |
| Austria (50)                |                               |                                    |          |                                                            |
| Country Leaders             |                               |                                    |          |                                                            |
| Irene Marthe Lang, MD       |                               |                                    |          |                                                            |
| Kurt Huber, MD              |                               |                                    |          |                                                            |
|                             | Herwig Schuchlenz, MD         | Gudrun Steinmaurer                 | Graz     | LKH Graz West Austria (35)                                 |
|                             | Stefan Weikl, MD              |                                    |          |                                                            |
|                             | Irene Marthe Lang, MD         | Max-Paul Winter, MD                | Vienna   | Medical University of Vienna, Department of Cardiology (8) |
|                             |                               | Tijana, Andric, MD                 | Vienna   | Wilhelminen Hospital Vienna (7)                            |
|                             | Kurt Huber, MD                | Maximilian, Tscharre, MD           |          |                                                            |
|                             | Gabriele, Jakl-Kotauschek, MD | Claudia, Wegmayr, MSc              |          |                                                            |
|                             |                               | Bernhard, Jäger, MD                |          |                                                            |
|                             |                               | Florian, Egger, MD                 |          |                                                            |
| Hungary (49)                |                               |                                    |          |                                                            |
| Country Leader              |                               |                                    |          |                                                            |
| Matyas Keltai, MD, PhD, DSc |                               |                                    |          |                                                            |
|                             | Andras Vertes, MD             | Judit Sebo, MD                     | Budapest | Eszszk- Szent Istvan Hospital (20)                         |
|                             |                               | Zoltan Davidovits, MD              |          |                                                            |
|                             |                               | Laszlone Matics                    |          |                                                            |
|                             | Albert Varga, MD, PhD         | Gergely Ágoston, MD                | Szeged   | University of Szeged (12)                                  |
|                             | Geza Fontos, MD               | Gabor Dekany, MD                   | Budapest | George Gottsegen National Institute of Cardiology (9)      |
|                             | Bela Merkely, MD, PhD, DSc    | Andrea Bartykowszki, MD            | Budapest | Heart and Vascular Center, Semmelweis University (8)       |
|                             |                               | Pal Maurovich-Horvat, MD, PhD, MPH |          |                                                            |
|                             | Gabor Kerecsen, MD            | Agnes Jakal                        | Budapest | Military Hospital, Budapest (1)                            |
| Serbia (47)                 |                               |                                    |          |                                                            |
|                             | Sasa Hinic, MD, BSc           | Jelena Djokic, MD                  | Belgrade |                                                            |

|             |                                 |                                  |                  |                                                                                                                              |
|-------------|---------------------------------|----------------------------------|------------------|------------------------------------------------------------------------------------------------------------------------------|
|             | Marija Zdravkovic, MD, PhD      |                                  |                  | University Hospital Center Bežanijska Kosa (13)                                                                              |
|             | Vladan Mudrenovic, MD           |                                  |                  |                                                                                                                              |
|             | Bogdan Crnokrak, MD             |                                  |                  |                                                                                                                              |
|             | Branko D. Beleslin, MD, PhD     |                                  | Belgrade         | Faculty of Medicine, University of Belgrade; Cardiology Clinic, Clinical Center of Serbia (10)                               |
|             | Nikola N. Boskovic, MD          | Ana D. Djordjevic-Dikic, MD, PhD |                  |                                                                                                                              |
|             | Marija T. Petrovic, MD          | Vojislav L. Giga, MD, PhD        |                  |                                                                                                                              |
|             | Milan R. Dobric, MD             | Jelena J. Stepanovic, MD, PhD    |                  |                                                                                                                              |
|             | Zeljko Z. Markovic, MD, PhD     |                                  |                  |                                                                                                                              |
|             | Ana S. Mladenovic, MD, PhD      |                                  |                  |                                                                                                                              |
|             | Nada Cemerlic-Adjic, MD         | Lazar Velicki, MD                | Sremska Kamenica | Institute of Cardiovascular Diseases Vojvodina, Sremska Kamenica, Serbia and Faculty of Medicine, University of Novi Sad (9) |
|             |                                 | Ljiljana Pupic                   |                  |                                                                                                                              |
|             | Goran Davidović, MD, PhD        | Stefan M. Simović, MD            | Kragujevac       | Clinical Center Kragujevac (7)                                                                                               |
|             | Rada Vučić, MD                  |                                  |                  |                                                                                                                              |
|             | Milica Nikola Dekleva, MD PhD   | Miroslav Stevo Martinovic, MD    | Belgrade         | University Clinical Hospital Zvezdara (6)                                                                                    |
|             |                                 | Gordana Stevanovic               |                  |                                                                                                                              |
|             | Goran Stankovic, MD             | Milan Dobric                     | Belgrade         | Clinical Center of Serbia (1)                                                                                                |
|             | Svetlana Apostolovic, MD        | Sonja Salinger Martinovic        | Nis              | Clinic for Cardiovascular Diseases, Clinical Center Nis (1)                                                                  |
|             |                                 | Dragana Stanojevic               |                  |                                                                                                                              |
| Mexico (46) |                                 |                                  |                  |                                                                                                                              |
|             | Jorge Escobedo, MD              | Ramon de Jesús-Pérez, RN         | Benito Juarez    | Instituto Mexicano del Seguro Social (35)                                                                                    |
|             | Rubén Baleón-Espinosa, MD       |                                  |                  |                                                                                                                              |
|             | Arturo S Campos-Santaolalla, MD |                                  |                  |                                                                                                                              |
|             | Elihú Durán-Cortés, MD          |                                  |                  |                                                                                                                              |
|             | José M Flores-Palacios, MD      |                                  |                  |                                                                                                                              |
|             | Andrés García-Rincón, MD        |                                  |                  |                                                                                                                              |
|             | Moisés Jiménez-Santos, MD       |                                  |                  |                                                                                                                              |
|             | Joaquín V Peñafiel, MD          |                                  |                  |                                                                                                                              |
|             | José A Ortega-Ramírez, MD       |                                  |                  |                                                                                                                              |

|                                            |                                            |                                             |                     |                                                         |  |
|--------------------------------------------|--------------------------------------------|---------------------------------------------|---------------------|---------------------------------------------------------|--|
|                                            | Aquiles Valdespino-Estrada, MD             |                                             |                     |                                                         |  |
|                                            | Erick Alexánderson Rosas, MD               | María Fernanda Canales Brassetti, MD        | Mexico City         | Instituto Nacional de Cardiología "Ignacio Chávez" (11) |  |
|                                            |                                            | Diego Adrián Vences Anaya, MD               |                     |                                                         |  |
|                                            |                                            | María Pérez García                          |                     |                                                         |  |
|                                            |                                            | Isabel Estela Carvajal Juárez, MD           |                     |                                                         |  |
|                                            |                                            | Magdalena Madero Rovalo, MC                 |                     |                                                         |  |
|                                            |                                            | Erick Donato Morales Rodríguez, MD          |                     |                                                         |  |
| Australia (45)                             |                                            |                                             |                     |                                                         |  |
| Country Leaders                            |                                            |                                             |                     |                                                         |  |
| Joseph B. Selvanayagam, MBBS (Hons), DPhil |                                            |                                             |                     |                                                         |  |
| Jamie Rankin, MBBS ( <i>past</i> )         |                                            |                                             |                     |                                                         |  |
| Country Coordinator                        |                                            |                                             |                     |                                                         |  |
| Deirdre Murphy                             |                                            |                                             |                     |                                                         |  |
|                                            | Joseph B. Selvanayagam, MBBS (Hons), DPhil | Sau Lee, PhD                                | Adelaide            | Flinders Medical Centre (30)                            |  |
|                                            | Majo X. Joseph, MBBS                       | Prince Thomas, RN                           |                     |                                                         |  |
|                                            | Suku T. Thambar, MBBS                      | Melissa D Chaplin, RN                       | New Lambton Heights | John Hunter Hospital (8)                                |  |
|                                            |                                            | Stephanie C Boer, B Biotechnology (Honours) |                     |                                                         |  |
|                                            | John F. Beltrame, MD                       | Jeanette K. Stansborough, RN                | Woodville South     | The Queen Elizabeth Hospital (5)                        |  |
|                                            |                                            | Marilyn Black, RN                           |                     |                                                         |  |
|                                            | Graham S. Hillis, PhD                      | Michelle M. Bonner, B. Nursing              | Perth               | Royal Perth Hospital (2)                                |  |
|                                            |                                            | Kim F. Ireland, RN                          |                     |                                                         |  |
|                                            |                                            | Clare Venn-Edmonds, RN                      |                     |                                                         |  |
| France (42)                                |                                            |                                             |                     |                                                         |  |
| Country Leader                             |                                            |                                             |                     |                                                         |  |
| Philippe-Gabriel Steg, MD                  |                                            |                                             |                     |                                                         |  |
| Country Coordinators                       |                                            |                                             |                     |                                                         |  |
| Helene Abergel                             |                                            |                                             |                     |                                                         |  |
| Jean-Michel Juliard                        |                                            |                                             |                     |                                                         |  |
|                                            |                                            | Corine Thobois, RN                          | Chartres            | C.H. Louis Pasteur (21)                                 |  |
|                                            | Christophe Thuair, MD                      | Emilie Tachot, RN                           |                     |                                                         |  |

|                   |                             |                                   |                        |                                                     |
|-------------------|-----------------------------|-----------------------------------|------------------------|-----------------------------------------------------|
|                   | Téodora Dutoiu, MD          | Christophe Laure, RN              |                        |                                                     |
|                   |                             | Christel Vassaliere, RN           |                        |                                                     |
|                   | Philippe Gabriel Steg, MD   | Helene Abergel, MSc               | Paris                  | Bichat Hospital (9)                                 |
|                   | Jean-Michel Juliard, MD     | Axelle Fuentes, MSc               |                        |                                                     |
|                   | Michel S. Slama, MD         | Ludivine Eliahou, MD              | Clamart Cedex          | Antoine-Beclere Hospital (5)                        |
|                   | Rami El Mahmoud, MD         | Olivier Dubourg, MD               | Boulogne               | Ambroise Pare Hospital (2)                          |
|                   |                             | Pierre Michaud, MD                |                        |                                                     |
|                   | Eric Nicollet, MD           | Sarah Hadjih                      | Corbeil-Essonnes Cedex | Centre Hospitalier Sud Francilien (2)               |
|                   | Pascal Goube, MD            | Patricia Brito                    |                        |                                                     |
|                   | Gilles Barone-Rochette, MD  | Gilles Barone-Rochette            | Grenoble               | Grenoble University Hospital (2)                    |
|                   | Alain Furber, MD            | Charles Cornet, MD, PhD           | Angers Cedex 9         | Centre Hospitalier Universitaire d'Angers (1)       |
|                   | Loïc Bière, MD              | Jeremy Rautureau, MD, PhD         |                        |                                                     |
| Lithuania (39)    |                             |                                   |                        |                                                     |
|                   |                             | Agne Juceviciene, MD              | Vilnius                | Vilnius University Hospital Santariskes Clinic (39) |
|                   |                             | Irma Kalibataite-Rutkauskiene, MD |                        |                                                     |
|                   |                             | Laura Keinaite                    |                        |                                                     |
|                   | Aleksandras Laucevicius, MD | Monika Laukyte                    |                        |                                                     |
|                   | Jelena Celutkiene, MD       | Gelmina Mikolaitiene              |                        |                                                     |
|                   |                             | Akvile Smigelskaite, MD           |                        |                                                     |
|                   |                             | Ilona Tamasauskiene, MD           |                        |                                                     |
|                   |                             | Agne Urboniene, MD                |                        |                                                     |
| *Netherlands (37) |                             |                                   |                        |                                                     |
|                   | Elvin Kedhi MD, PhD         |                                   | Zwolle                 | Isala Klinieken (25)                                |
|                   | Jorik Timmer, MD            | Ilse Bouwhuis                     |                        |                                                     |
|                   | Rik Hermanides, MD          | Lia Nijmeijer                     |                        |                                                     |
|                   | Eliza Kaplan, MD            |                                   |                        |                                                     |
|                   | Robert K. Riezebos, MD, PhD |                                   | Amsterdam              | Cardio Research Hartcentrum OLVG (11)               |
|                   | Pouneh Samadi, MD           | Jeannette, J. M. Schoep, RN       |                        |                                                     |
|                   | Elise van Dongen, MD        | Elisabeth, M. Janzen, RN          |                        |                                                     |
|                   | Sander R. Niehe, MD         |                                   |                        |                                                     |

|                                 |                                |                                   |                   |                                                                  |
|---------------------------------|--------------------------------|-----------------------------------|-------------------|------------------------------------------------------------------|
|                                 | Harry Suryapranata, MD         | Sandra Ahoud                      | Nijmegen          | Radboudumc (1)                                                   |
|                                 | Stijn van Vugt, MD, PhD        |                                   |                   |                                                                  |
| Portugal (33)                   |                                |                                   |                   |                                                                  |
|                                 | Ruben Ramos, MD                |                                   | Lisbon            | Hospital de Santa Marta (25)                                     |
|                                 | Duarte Cacela, MD              |                                   |                   |                                                                  |
|                                 | Ana Santana, MD                |                                   |                   |                                                                  |
|                                 | Antonio Fiarresga, MD          |                                   |                   |                                                                  |
|                                 | Lidia Sousa, MD                |                                   |                   |                                                                  |
|                                 | Hugo Marques, MD               |                                   |                   |                                                                  |
|                                 | Lino Patricio, MD              | Mafalda Selas                     |                   |                                                                  |
|                                 | Luis Bernanrdes, MD            | Filipa Silva                      |                   |                                                                  |
|                                 | Pedro Rio, MD                  | Cláudia Freixo                    |                   |                                                                  |
|                                 | Ramiro Carvalho, MD            |                                   |                   |                                                                  |
|                                 | Rui Ferreira, MD               |                                   |                   |                                                                  |
|                                 | Tiago Silva, MD                |                                   |                   |                                                                  |
|                                 | Ines Rodrigues, MD             |                                   |                   |                                                                  |
|                                 | Pedro Modas, MD                |                                   |                   |                                                                  |
|                                 | Guilherme Portugal, MD         |                                   |                   |                                                                  |
|                                 | Jose Fragata, MD               |                                   |                   |                                                                  |
|                                 | Fausto J. Pinto, PhD           | Inês Zimbarra Cabrita, PhD        | Lisbon            | Santa Maria University Hospital, Cardiology Department, CHLN (6) |
|                                 | Miguel Nobre Menezes, MD       | Andreia Rocha, MSc                |                   |                                                                  |
|                                 | Guilhermina Cantinho Lopes, MD | Francisca Patuleia Figueiras, PhD |                   |                                                                  |
|                                 | Ana Gomes Almeida, PhD         | Andreia Coelho, BSc               |                   |                                                                  |
|                                 | Pedro Canas Silva, MD          | Marta Capinha                     |                   |                                                                  |
|                                 | Angelo Nobre, MD               | Maria Inês Caetano                |                   |                                                                  |
|                                 | Ana Rita Francisco, MD         | Susana Silva                      |                   |                                                                  |
|                                 | Nuno Ferreira, MD              |                                   | Vila Nova de Gaia | Centro Hospitalar de Vila Nova de Gaia/Espinho, EPE (2)          |
|                                 | Ricardo L. Lopes, MD           |                                   |                   |                                                                  |
| Argentina (29)                  |                                |                                   |                   |                                                                  |
| Country Leader                  |                                |                                   |                   |                                                                  |
| Rafael Diaz, MD ( <i>past</i> ) |                                |                                   |                   |                                                                  |

|                          |                                       |                        |                                 |                                                     |  |
|--------------------------|---------------------------------------|------------------------|---------------------------------|-----------------------------------------------------|--|
|                          | Luis Guzman, MD                       | Veronica Tinnirello    | Cordoba                         | Instituto Medico DAMIC (11)                         |  |
|                          | Julio César Figal, MD                 | Matías Nicolás Mungo   | Ciudad Autónoma de Buenos Aires | Fundación Favalaro (10)                             |  |
|                          | Oscar Méndiz, MD                      |                        |                                 |                                                     |  |
|                          | Claudia Cortés, MD                    |                        |                                 |                                                     |  |
|                          | Roberto René Favalaro, MD             |                        |                                 |                                                     |  |
|                          | Carlos Alvarez, MD                    | Marina Garcia          | Bahia Blanca                    | Hospital Italiano Regional del Sur Bahia Blanca (3) |  |
|                          | Javier Courtis, MD                    | Valeria Godoy          | Cordoba                         | Clinica Romagosa and Clinica De La Familia (2)      |  |
|                          | Gabriela Zeballos, MD                 |                        |                                 |                                                     |  |
|                          | Lilia Schiavi, MD                     | Maria Victoria Actis   | Cordoba                         | Clinica Del Prado (2)                               |  |
|                          | Mariano Rubio, MD                     | Graciela Scaro, MD     | Cordoba                         | Clínica Privada Vélez Sarsfield (1)                 |  |
| *New Zealand (28)        |                                       |                        |                                 |                                                     |  |
| Country Leader           |                                       |                        |                                 |                                                     |  |
| Harvey Douglas White, MD |                                       |                        |                                 |                                                     |  |
| Country Coordinator      |                                       |                        |                                 |                                                     |  |
| Caroline Alsweiler       |                                       |                        |                                 |                                                     |  |
|                          | Gerard Patrick Devlin, MD             | Liz Low, RN            | Hamilton                        | Waikato Hospital (22)                               |  |
|                          | Raewyn Fisher, MD                     | Jayne Scales, RN       |                                 |                                                     |  |
|                          |                                       | Kirsty Abercrombie, RN |                                 |                                                     |  |
|                          | Ralph Alan Huston Stewart, MCCChB, MD | Leah Howell, RN        | Auckland                        | Auckland City Hospital (6)                          |  |
|                          | Harvey Douglas White, MD              | Cathrine Patten, RN    |                                 |                                                     |  |
|                          | Jocelyne Benatar, MD                  |                        |                                 |                                                     |  |
| *Macedonia (28)          |                                       |                        |                                 |                                                     |  |
|                          | Sasko Kedev, MD, PhD                  |                        | Skopje                          | University Clinic of Cardiology (28)                |  |
|                          | Irena Peovska Mitevaska, MD, PhD      |                        |                                 |                                                     |  |
|                          | Elizabeta Srbinska Kostovska, MD, PhD |                        |                                 |                                                     |  |
|                          | Hristo Pejkov, MD, PhD                |                        |                                 |                                                     |  |
| *Sweden (23)             |                                       |                        |                                 |                                                     |  |
| Country Leader           |                                       |                        |                                 |                                                     |  |
| Claes Held, MD, PhD      |                                       |                        |                                 |                                                     |  |
|                          | Claes Held, MD, PhD                   |                        | Uppsala                         | Uppsala University (18)                             |  |

|                                |                           |                          |             |                                                 |
|--------------------------------|---------------------------|--------------------------|-------------|-------------------------------------------------|
|                                | Kai Eggers, MD, PHhD      |                          |             |                                                 |
|                                | Gunnar Frostfelt, MD, PhD | Christina Björklund, RN  |             |                                                 |
|                                | Nina Johnston, MD, PhD    | Maria Andreasson, RN     |             |                                                 |
|                                | Maciej Olsowka, MD        | Marie Essermark, RN      |             |                                                 |
|                                | Axel Åkerblom, MD, PhD    |                          |             |                                                 |
|                                | Inga Soveri, MD, PhD      |                          |             |                                                 |
|                                | Johannes Aspberg, MD      | Liselotte Persson        | Stockholm   | Karolinska Institutet at Danderyd Hospital (5)  |
| Israel (15)                    |                           |                          |             |                                                 |
| Country Leaders                |                           |                          |             |                                                 |
| Rafael Beyar, MD, MD, DSc, MPH |                           |                          |             |                                                 |
| Tali Sharir, MD                |                           |                          |             |                                                 |
| Country Coordinator            |                           |                          |             |                                                 |
| Eugenia Nikolsky, MD           |                           |                          |             |                                                 |
|                                | Tali Sharir, MD           | Or Harel, MA             | Tel-Aviv    | Assuta Medical Centers (9)                      |
|                                | Dan Eliau, MD             |                          |             |                                                 |
|                                | Arthur Kerner, MD         | Margalit Bentzvi         | Haifa       | Rambam Medical Center (6)                       |
|                                | Samia Massalha, MD        | Ludmila Helmer           |             |                                                 |
| Japan (14)                     |                           |                          |             |                                                 |
| Country Leader                 |                           |                          |             |                                                 |
| Shun Kohsaka, MD               |                           |                          |             |                                                 |
|                                | Keiichi Fukuda, MD, PhD   | Ikuko Ueda, PhD          | Shinjuku-ku | Keio University (7)                             |
|                                | Shun Kohsaka, MD          | Jun Fujita, MD           |             |                                                 |
|                                | Satoshi Yasuda, MD, PhD   | Akemi Furukawa, RN       | Suita-shi   | National Cerebral and Cardiovascular Center (4) |
|                                |                           | Kanae Hirase, RN         |             |                                                 |
|                                |                           | Toshiyuki Nagai, MD, PhD |             |                                                 |
|                                |                           | Fumiyuki Otsuka, MD, PhD |             |                                                 |
|                                | Shigeyuki Nishimura, MD   | Shintaro Nakano          | Hidaka      | Saitama Medical University (3)                  |
| *Belgium (7)                   |                           |                          |             |                                                 |
| Country Leader                 |                           |                          |             |                                                 |
| Frans Van de Werf, MD, PhD     |                           |                          |             |                                                 |
| Country Coordinator            |                           |                          |             |                                                 |
| Kaatje Goetschalckx, MD        |                           |                          |             |                                                 |

|                          |                            |                                        |             |                                                      |  |
|--------------------------|----------------------------|----------------------------------------|-------------|------------------------------------------------------|--|
|                          | Kaatje Goetschalckx, MD    | Valerie Robesyn                        | Leuven      | University Hospital Leuven (7)                       |  |
|                          | Frans Van de Werf, PhD, MD |                                        |             |                                                      |  |
|                          | Kathleen Claes, PhD, MD    |                                        |             |                                                      |  |
| *Taiwan (7)              |                            |                                        |             |                                                      |  |
| Country Leader           |                            |                                        |             |                                                      |  |
| Harvey Douglas White, MD |                            |                                        |             |                                                      |  |
| Country Coordinator      |                            |                                        |             |                                                      |  |
| Caroline Alweiler        |                            |                                        |             |                                                      |  |
|                          | Chung-Lieh Hung, MD        | Yi-Hsuan Yang                          | Taipei City | Mackay Memorial Hospital (7)                         |  |
|                          | Chun-Ho Yun, MD            |                                        |             |                                                      |  |
|                          | Charles Jia-Yin Hou, MD    |                                        |             |                                                      |  |
|                          | Jen-Yuan Kuo, MD           |                                        |             |                                                      |  |
|                          | Hung-I Yeh, MD, PhD        |                                        |             |                                                      |  |
|                          | Ta-Chuan Hung, MD          |                                        |             |                                                      |  |
|                          | Jiun-Yi Li , MD, PhD       |                                        |             |                                                      |  |
|                          | Chen-Yen Chien, MD, PhD    |                                        |             |                                                      |  |
|                          | Cheng-Ting Tsai, MD        |                                        |             |                                                      |  |
|                          | Chun-Chieh Liu, MD         |                                        |             |                                                      |  |
|                          | Fa-Chang Yu, MD            |                                        |             |                                                      |  |
|                          | Yueh-Hung Lin, MD          |                                        |             |                                                      |  |
|                          | Wei-Ren Lan, MD            |                                        |             |                                                      |  |
|                          | Chih-Hsuan Yen, MD         |                                        |             |                                                      |  |
|                          | Jui-Peng Tsai, MD          |                                        |             |                                                      |  |
|                          | Kuo-Tzu Sung, MD           |                                        |             |                                                      |  |
| *South Africa (7)        |                            |                                        |             |                                                      |  |
|                          | Mpiko Ntsekhe, MD          |                                        | Cape Town   | Groote Schuur Hospital / University of Cape Town (7) |  |
|                          | Shaheen Pandie, MD         | Constance Philander (Nee Talliard), ND |             |                                                      |  |
|                          | Charle A Viljoen, MD       | Noloyiso Mtana, RN                     |             |                                                      |  |
|                          | Marianne De Andrade, MD    |                                        |             |                                                      |  |
| *Switzerland (7)         |                            |                                        |             |                                                      |  |
| Country Leader           |                            |                                        |             |                                                      |  |

|                          |                                    |                                   |                  |                                                                              |  |
|--------------------------|------------------------------------|-----------------------------------|------------------|------------------------------------------------------------------------------|--|
| Aldo P. Maggioni, MD     |                                    |                                   |                  |                                                                              |  |
|                          | Tiziano Moccetti, MD               | Adriana Anesini, RN               | Lugano           | Cardiocentro (7)                                                             |  |
|                          | M.Grazia Rossi, MD                 | Simona Maspoli, RN                |                  |                                                                              |  |
|                          |                                    | Manuela Mombelli, RN              |                  |                                                                              |  |
| Egypt (6)                |                                    |                                   |                  |                                                                              |  |
|                          | Magdy Abdelhamid, MD               | Ahmed Talaat, MD                  | Cairo            | Cairo University (6)                                                         |  |
|                          | Ahmed Adel, MD                     |                                   |                  |                                                                              |  |
|                          | Ahmed Kamal, MSc                   |                                   |                  |                                                                              |  |
|                          | Hossam Mahrous, MD                 |                                   |                  |                                                                              |  |
|                          | Sameh El Kaffas, MD                |                                   |                  |                                                                              |  |
|                          | Hussien El Fishawy, MD             |                                   |                  |                                                                              |  |
| Romania (5)              |                                    |                                   |                  |                                                                              |  |
|                          | Calin Pop, MD, PhD                 |                                   | Bucharest        | Emergency County Hospital Baia Mare (4)                                      |  |
|                          | Matei Claudia, MD, PhD             |                                   |                  |                                                                              |  |
|                          | Bogdan A. Popescu, MD, PhD         |                                   | Bucharest        | Emergency Institute of Cardiovascular Diseases "Prof. Dr. C. C. Iliescu" (1) |  |
|                          | Carmen Ginghina, MD, PhD           | Monica Rosca, MD, PhD             |                  |                                                                              |  |
|                          | Dan Deleanu, MD, PhD               | Carmen C. Beladan, MD, PhD        |                  |                                                                              |  |
|                          | Vlad A. Iliescu, MD, PhD           |                                   |                  |                                                                              |  |
| *Saudi Arabia (5)        |                                    |                                   |                  |                                                                              |  |
|                          | Mouaz H. Al-Mallah, MD MSc         | Sarah Zahrani, RN                 | Central Province | King AbdulAziz Cardiac Center (5)                                            |  |
|                          | Ahmed Aljzeeri, MD                 |                                   |                  |                                                                              |  |
|                          | Hani Najm, MD                      |                                   |                  |                                                                              |  |
|                          | Ali Alghamdi, MD                   |                                   |                  |                                                                              |  |
| *Peru (4)                |                                    |                                   |                  |                                                                              |  |
|                          | Walter Enrique Mogrovejo Ramos, MD | Marco Antonio Monsalve Davila, RN | Mirafloes        | Instituto Neuro Cardiovascular De Las Americas (4)                           |  |
| Thailand (3)             |                                    |                                   |                  |                                                                              |  |
| Country Leader           |                                    |                                   |                  |                                                                              |  |
| Harvey Douglas White, MD |                                    |                                   |                  |                                                                              |  |
| Country Coordinator      |                                    |                                   |                  |                                                                              |  |
| Caroline Alweiler        |                                    |                                   |                  |                                                                              |  |

|                                                                                      |                                 |                          |              |                                        |  |
|--------------------------------------------------------------------------------------|---------------------------------|--------------------------|--------------|----------------------------------------|--|
|                                                                                      | Srun Kuanprasert, MD            |                          | Chiang Mai   | Maharaj Nakorn Chiang Mai Hospital (2) |  |
|                                                                                      | Arintaya Prommintikul, MD       |                          |              |                                        |  |
|                                                                                      | Weerachai Nawarawong, MD        | Supatchara Khwakhong, RN |              |                                        |  |
|                                                                                      | Surin Woragidpoonpol, MD        | Anong Chaiyasri, RN      |              |                                        |  |
|                                                                                      | Thitipong Tepsuwan, MD          | Warangkana Mekara, RN    |              |                                        |  |
|                                                                                      | Noppon Taksaudom, MD            | Supap Kulthawong, RN     |              |                                        |  |
|                                                                                      | Chataroon Rimsukcharoenchai, MD | Anong Amaritakomol, RN   |              |                                        |  |
|                                                                                      | Juntima Euathrongchit, MD       |                          |              |                                        |  |
|                                                                                      | Yutthaphan Wannasopha, MD       |                          |              |                                        |  |
|                                                                                      | Sukit Yamwong, MD               | Pachara Panpunuan, RN    | Bangkok      | Ramathibodi Hospital (1)               |  |
|                                                                                      | Piyamitr Sritara, MD            |                          |              |                                        |  |
|                                                                                      | Suthara Aramcharoen, MD         |                          |              |                                        |  |
|                                                                                      | Krissada Meemuk, MD             |                          |              |                                        |  |
| *Malaysia (2)                                                                        |                                 |                          |              |                                        |  |
| Country Leader                                                                       |                                 |                          |              |                                        |  |
| Harvey Douglas White, MD                                                             |                                 |                          |              |                                        |  |
| Country Coordinator                                                                  |                                 |                          |              |                                        |  |
| Caroline Alswelier                                                                   |                                 |                          |              |                                        |  |
|                                                                                      | Ahmad Khairuddin, MD            | Noor Syamira Mokhtar, RN | Kuala Lumpur | Institut Jantung Negara (2)            |  |
|                                                                                      | Hafidz Abd Hadi, MD             | Nor Asiah Basri, RN      |              |                                        |  |
|                                                                                      | Shaiful Azmi Yahaya, MD         | Irni Yusnida, RN         |              |                                        |  |
|                                                                                      |                                 | Humayrah Hashim          |              |                                        |  |
| * Countries participated in Economics Quality of Life (EQoL) Questionnaires          |                                 |                          |              |                                        |  |
| **This site received one participant in transfer that was randomized at another site |                                 |                          |              |                                        |  |

**eTable 2**  
**Committees, CCC, Study Centers Personnel**

|                                               |
|-----------------------------------------------|
| <b>Past and Current Committee Members</b>     |
| <b>Leadership Committee</b>                   |
| Judith S. Hochman (Chair)                     |
| David J. Maron (Co-Chair)                     |
| William Boden (Co-Principal Investigator)     |
| Bruce Ferguson (Co-Principal Investigator)    |
| Robert Harrington (Co-Principal Investigator) |
| Gregg W. Stone (Co-Principal Investigator)    |
| David Williams (Co-Principal Investigator)    |
| <b>Executive Committee</b>                    |
| Judith S. Hochman (Chair)                     |
| David J. Maron (Co-Chair)                     |
| Karen P. Alexander                            |
| Sripal Bangalore                              |
| Jeffrey Berger                                |
| William Boden                                 |
| Robert Harrington                             |
| Daniel Mark                                   |
| Sean M. O'Brien                               |
| Harmony R. Reynolds                           |
| Yves Rosenberg                                |
| Leslee J. Shaw                                |
| John Spertus                                  |
| Gregg W. Stone                                |
| <b>Steering Committee</b>                     |
| Judith S. Hochman (Chair)                     |
| David J. Maron (Co-Chair)                     |
| Members of Executive Committee                |
| Christie Ballantyne*                          |
| Daniel Berman                                 |
| Rafael Beyar*                                 |
| Chris Buller*                                 |
| Antonio (Tony) Carvalho*                      |
| Bernard R. Chaitman                           |
| Rafael Diaz*                                  |
| Rolf Doerr                                    |
| Vladimir Dzavik                               |
| Bruce Ferguson                                |
| Shaun Goodman                                 |
| Gilbert Gosselin                              |
| Rory Hachamovitch*                            |

|                                                             |
|-------------------------------------------------------------|
| Christian Hamm*                                             |
| Claes Held                                                  |
| Malte Helm*                                                 |
| Kurt Huber*                                                 |
| Lixin Jiang                                                 |
| Matyas Keltai                                               |
| Shun Kohsaka                                                |
| Irene Lang*                                                 |
| Renato Lopes                                                |
| Jose Lopez-Sendon                                           |
| Aldo Maggioni                                               |
| John Mancini                                                |
| C. Noel Bairey Merz                                         |
| James Min                                                   |
| Eric Peterson*                                              |
| Michael H. Picard                                           |
| Witold Ruzyllo                                              |
| Joseph Selvanayagam                                         |
| Roxy Senior                                                 |
| Tali Sharir                                                 |
| Gabriel Steg                                                |
| Hanna Szwed                                                 |
| Frans Van de Werf*                                          |
| William Weintraub                                           |
| Harvey White                                                |
| David Williams                                              |
| <b>Optimal Medical Therapy Committee</b>                    |
| William Boden (Co-Chair)                                    |
| David J. Maron (Co-Chair)                                   |
| Christie Ballantyne                                         |
| Sripal Bangalore                                            |
| Karen Calfas                                                |
| Bernard R. Chaitman                                         |
| Mary Ann Champagne                                          |
| Michael Davidson                                            |
| Jerome Fleg                                                 |
| Peter A. McCullough                                         |
| Jonathan Newman                                             |
| Peter Stone                                                 |
| <b>Optimal Revascularization Therapy Planning Committee</b> |
| Gregg W. Stone (Chair)                                      |
| Subcommittee: CABG                                          |
| Bruce Ferguson (Co-Chair)                                   |
| Philippe Menasche (Co-Chair)                                |

|                                        |
|----------------------------------------|
| Sripal Bangalore                       |
| Michael Davidson**                     |
| Stephen Frenes                         |
| Robert Guyton                          |
| Michael Mack                           |
| Fred Mohr                              |
| Anupama Rao                            |
| Joe Sabik                              |
| Oz Shapira                             |
| David Taggart                          |
| James Tatoulis                         |
| <b>Subcommittee: PCI</b>               |
| David Williams (Co-Chair)              |
| Sripal Bangalore                       |
| Jim Blankenship                        |
| Sorin Brener                           |
| Chris Buller                           |
| Antonio Colombo                        |
| Bernard de Bruyne                      |
| Philippe G n reux                      |
| Robert Harrington                      |
| Dean Kereiakes                         |
| Thierry Lefevre                        |
| Jeffrey Moses                          |
| <b>Clinical Events</b>                 |
| <b>Endpoint Definition Panel</b>       |
| Bernard R. Chaitman (Chair)            |
| Karen P. Alexander                     |
| Judith S. Hochman                      |
| Ken Mahaffey                           |
| David J. Maron                         |
| Gregg W. Stone                         |
| Harvey White                           |
| <b>Clinical Event Review Committee</b> |
| Bernard R. Chaitman (Chair)            |
| Salvador Cruz-Flores                   |
| Nicholas Danchin                       |
| Eli Feen                               |
| Mario J. Garcia                        |
| Paul Hauptman                          |
| Abhay A. Laddu                         |
| Eugene Passamani                       |
| Ileana L. Pina                         |
| Maarten Simoons                        |

|                                               |
|-----------------------------------------------|
| Hicham Skali                                  |
| Kristian Thygesen                             |
| David Waters                                  |
| <b>CEC Administrative Group</b>               |
| Karen P. Alexander                            |
| Patricia Endsley*                             |
| Gerard Esposito                               |
| Jeffrey Kanters                               |
| John Pownall                                  |
| Dimitrios Stournaras                          |
| <b>ISCHEMIA Imaging Committee</b>             |
| Leslee J. Shaw (Chair)                        |
| Daniel Berman                                 |
| Matthias Friedrich                            |
| Rory Hachamovitch                             |
| Raymond Kwong                                 |
| John Mancini                                  |
| James Min                                     |
| Dana Oliver                                   |
| Michael H. Picard                             |
| Harmony R. Reynolds                           |
| <b>Biostatistics Planning Committee</b>       |
| Frank Harrell (Chair)                         |
| Jeffrey Blume                                 |
| Kerry Lee                                     |
| Sean M. O'Brien                               |
| <b>BioRepository Committee</b>                |
| Jeffrey Berger (Chair)                        |
| Claes Held                                    |
| Iftikhar Kullo                                |
| Bruce McManus                                 |
| Kristin Newby                                 |
| <b>EQOL Committee</b>                         |
| Daniel Mark (Co-Chair)                        |
| John Spertus (Co-Chair)                       |
| David Cohen                                   |
| William Weintraub                             |
| <b>Recruitment for Women &amp; Minorities</b> |
| C. Noel Bairey Merz (Chair)                   |
| Raffaele Bugiardini                           |
| Jelena Celutkiene                             |
| Jorge Escobedo                                |
| Angela Hoyer                                  |
| Radmila Lyubarova                             |

|                                          |
|------------------------------------------|
| Deirdre Mattina                          |
| Jesus Peteiro                            |
| Harmony R. Reynolds                      |
| Paola Smanio                             |
| <b>Publications</b>                      |
| David J. Maron (Chair)                   |
| Karen P. Alexander                       |
| Sripal Bangalore                         |
| Jeffrey Berger                           |
| William Boden                            |
| Robert Harrington                        |
| Judith S. Hochman                        |
| Sean M. O'Brien                          |
| Harmony R. Reynolds                      |
| Yves Rosenberg                           |
| Gregg W. Stone                           |
| <b>Publication Subcommittees</b>         |
| <b>Economics</b>                         |
| Daniel Mark (Chair)                      |
| John Spertus                             |
| <b>QOL</b>                               |
| John Spertus (Chair)                     |
| Daniel Mark                              |
| <b>Stress Testing</b>                    |
| Leslee J. Shaw (Chair)                   |
| Dan Berman                               |
| Bernard R. Chaitman                      |
| Jerome Fleg                              |
| Raymond Kwong                            |
| Michael H. Picard                        |
| Harmony R. Reynolds                      |
| Roxy Senior                              |
| <b>CCTA</b>                              |
| James Min (Chair)                        |
| Jonathan Leipsic                         |
| John Mancini                             |
| <b>Angiography</b>                       |
| Philippe Genereux (Co-Chair)             |
| Ziad Ali (Co-chair)                      |
| Gregg W. Stone                           |
| <b>Optimal Revascularization Therapy</b> |
| Gregg W. Stone (Chair)                   |
| Sripal Bangalore                         |
| T. Bruce Ferguson                        |

|                                                                   |
|-------------------------------------------------------------------|
| David Williams                                                    |
| <b>Optimal Medical Therapy</b>                                    |
| William Boden (Co-Chair)                                          |
| David J. Maron (Co-Chair)                                         |
| Jerome Fleg                                                       |
| Jonathan Newman                                                   |
| <b>Biorepository</b>                                              |
| Jeffrey Berger (Chair)                                            |
| <b>CEC</b>                                                        |
| Bernard R. Chaitman (Chair)                                       |
| Karen P. Alexander                                                |
| <b>CKD</b>                                                        |
| Sripal Bangalore (Chair)                                          |
| Karen P. Alexander                                                |
| Jerome Fleg                                                       |
| Judith S. Hochman                                                 |
| David J. Maron                                                    |
| Roy Mathew                                                        |
| Sean M. O'Brien                                                   |
| Harmony R. Reynolds                                               |
| Mandeep Sidhu                                                     |
| <b>CIAO</b>                                                       |
| Harmony R. Reynolds (Chair)                                       |
| <b>DSMB Members</b>                                               |
| Lawrence Friedman (Chair)                                         |
| Jeffrey Anderson                                                  |
| Jessica Berg*                                                     |
| David DeMets                                                      |
| C. Michael Gibson                                                 |
| Gervasio Lamas                                                    |
| Nicole Deming                                                     |
| Jonathan Himmelfarb                                               |
| Pamela Ouyang                                                     |
| Pamela Woodard                                                    |
| <b>Independent Statistical Analysis Center for DSMB Reporting</b> |
| Frank Harrell                                                     |
| Samuel Nwosu                                                      |
| <b>NHLBI Program Staff</b>                                        |
| <b>Project Office</b>                                             |
| Yves Rosenberg (Project Officer)                                  |
| Jerome Fleg                                                       |
| Ruth Kirby                                                        |
| <b>Statisticians</b>                                              |

|                                                                                    |
|------------------------------------------------------------------------------------|
| Neal Jeffries                                                                      |
| <b>ISCHEMIA Clinical Coordinating Center (CCC)</b>                                 |
| <b>Study Leadership</b>                                                            |
| Judith S. Hochman (Study Chair, Director of CCC)                                   |
| David J. Maron (Study Co-Chair, Co-Director of CCC, US Country Leader)             |
| <b>CCC Faculty</b>                                                                 |
| Sripal Bangalore (Optimal Revascularization Therapy CCC Director, Regional Leader) |
| Jeffrey Berger (Director of the Biorepository, Regional Leader)                    |
| William Boden (US-VA Regional Leader)                                              |
| Jonathan Newman (Optimal Medical Therapy CCC Director, Regional Leader)            |
| Harmony R. Reynolds (Associate Director of CCC, CCC Imaging Lead, Regional Leader) |
| Mandeep Sidhu (US-VA Regional Co-Leader)                                           |
| <b>Program Directors</b>                                                           |
| Jean E. Denaro**                                                                   |
| Stephanie Mavromichalis                                                            |
| <b>Project Managers</b>                                                            |
| Kevin Chan                                                                         |
| Gia Cobb                                                                           |
| Aira Contreras                                                                     |
| Diana Cukali                                                                       |
| Stephanie Ferket*                                                                  |
| Andre Gabriel*                                                                     |
| Antonietta Hansen                                                                  |
| Arline Roberts                                                                     |
| <b>Clinical Research Associates</b>                                                |
| Michelle Chang                                                                     |
| Graceanne Wayser                                                                   |
| Solomon Yakubov*                                                                   |
| Michelle Yee                                                                       |
| Clinical Trial Assistants                                                          |
| Caroline Callison                                                                  |
| Sharder Islam                                                                      |
| Charlotte Pirro*                                                                   |
| Albertina Qelaj                                                                    |
| Vincent Setang                                                                     |
| Brianna Wisniewski*                                                                |
| <b>Grants and Finance Administration</b>                                           |
| Margaret Gilsenan                                                                  |
| Bevin Lang                                                                         |
| Samaa Mohamed                                                                      |
| <b>Publications Coordinator</b>                                                    |
| Jihyun Lyo                                                                         |
| <b>Data Analyst</b>                                                                |

|                                                                    |
|--------------------------------------------------------------------|
| Mark Xavier                                                        |
| <b>Statistical and Data Coordinating Center (SDCC)</b>             |
| Sean M. O'Brien (Principal Investigator)                           |
| Karen P. Alexander (Co-Principal Investigator)                     |
| Akshay Bagai*                                                      |
| Samuel Broderick                                                   |
| Michelle Crowder                                                   |
| Derek Cyr                                                          |
| Patricia Endsley*                                                  |
| Xiangqiong Gu                                                      |
| Robert Harrington*                                                 |
| Lisa Hatch                                                         |
| Jeffrey Kanters                                                    |
| Kerry Lee*                                                         |
| Courtney Page                                                      |
| Wanda Parker*                                                      |
| Wayne Pennachi                                                     |
| Frank Rockhold                                                     |
| Dimitrios Stournaras                                               |
| Omar Thompson*                                                     |
| Sheri Ussery                                                       |
| <b>Economics and Quality of Life Coordinating Center (EQOL CC)</b> |
| <b>Duke Clinical Research Institute, Durham, NC</b>                |
| Daniel B. Mark (Principal Investigator)                            |
| Kevin Anstrom                                                      |
| Khaula Baloch                                                      |
| Janet Blount                                                       |
| Patricia Cowper                                                    |
| Linda Davidson-Ray                                                 |
| Laura Drew                                                         |
| Tina Harding                                                       |
| J David Knight                                                     |
| Diane Minshall Liu                                                 |
| Betsy O'Neal                                                       |
| Thomas Redick                                                      |
| <b>Saint Luke's Mid America Heart Institute, Kansas City, MO</b>   |
| John Spertus (Principal Investigator)                              |
| Philip Jones                                                       |
| Karen Nugent                                                       |
| Grace Jingyan Wang                                                 |
| <b>ISCHEMIA Imaging Coordinating Center (ICC)</b>                  |
| Leslee J. Shaw (Principal Investigator)                            |
| Larry Phillips                                                     |

|                                       |
|---------------------------------------|
| Abhinav Goyal                         |
| Holly Hetrick                         |
| Dana Oliver                           |
| <b>Nuclear Core Lab</b>               |
| Daniel Berman (Director)              |
| Sean W. Hayes (Co-Director)           |
| John D. Friedman                      |
| R. James Gerlach                      |
| Mark Hyun                             |
| Romalisa Miranda-Peats                |
| Piotr Slomka                          |
| Louise Thomson                        |
| CMR Core Lab                          |
| Raymond Y. Kwong (Director)           |
| Matthias Friedrich (Director)*        |
| Francois Pierre Mongeon (Co-Director) |
| Steven Michael*                       |
| <b>Echo Core Lab</b>                  |
| Michael H. Picard (Director)          |
| Judy Hung                             |
| Marielle Scherrer-Crosbie             |
| Xin Zeng                              |
| <b>ECG/ETT Core Lab</b>               |
| Bernard R. Chaitman (Director)        |
| Jane Eckstein                         |
| Bandula Guruge                        |
| Mary Streif                           |
| <b>Angiographic Core Lab</b>          |
| Ziad Ali (Director)                   |
| Philippe Genereux (Director)*         |
| Maria A. Alfonso                      |
| Maria P. Corral                       |
| Javier J. Garcia                      |
| Jennifer Horst                        |
| Ivana Jankovic                        |
| Maayan Konigstein                     |
| Mitchel B. Lustre                     |
| Yolayfi Peralta                       |
| Raquel Sanchez                        |
| <b>CCTA Core Lab</b>                  |
| James Min (Director)                  |
| Reza Arsanjani                        |
| Matthew Budoff                        |

|                                                                                              |
|----------------------------------------------------------------------------------------------|
| Kimberly Elmore                                                                              |
| Millie Gomez                                                                                 |
| Cameron Hague                                                                                |
| Niree Hindoyan                                                                               |
| Jonathan Leipsic                                                                             |
| GB John Mancini                                                                              |
| Rine Nakanishi                                                                               |
| M. Barbara Srichai-Parsia                                                                    |
| Eunice Yeoh                                                                                  |
| Tricia Youn                                                                                  |
| <b>Academic Research Organizations (AROs)</b>                                                |
| <b>Associazione Nazionale Medici Cardiologi Ospedalieri (ANMCO) -Italy &amp; Switzerland</b> |
| Aldo P. Maggioni (Country Leader)                                                            |
| Francesca Bianchini                                                                          |
| Martina Ceseri                                                                               |
| Andrea Lorimer                                                                               |
| Marco Magnoni                                                                                |
| Francesco Orso                                                                               |
| Laura Sarti                                                                                  |
| Martinia Tricoli                                                                             |
| <b>Brazilian Clinical Research Institute (BCRI) - Brazil</b>                                 |
| Antonio Carvalho (Country Leader)                                                            |
| Renato Lopes (Country Leader)                                                                |
| Lilian Mazza Barbosa                                                                         |
| Tauane Bello Duarte                                                                          |
| Tamara Colaiácovo Soares                                                                     |
| Flávia Egydio*                                                                               |
| Anelise Kawakami*                                                                            |
| Janaina Oliveira                                                                             |
| Elissa Restelli Piloto                                                                       |
| Jaqueline Pozzibon*                                                                          |
| <b>Canadian Heart Research Centre (CHRC) - Canada</b>                                        |
| Shaun Goodman (Country Leader)                                                               |
| Diane Camara                                                                                 |
| Neamat Mowafy                                                                                |
| Caroline Spindler                                                                            |
| <b>China Oxford Centre for International Health Research - China</b>                         |
| Lixin Jiang (Country Leader)                                                                 |
| Hao Dai                                                                                      |
| Fang Feng                                                                                    |
| Jia Li                                                                                       |
| Li Li                                                                                        |
| Jiamin Liu                                                                                   |

|                                                                                                       |
|-------------------------------------------------------------------------------------------------------|
| Qiulan Xie                                                                                            |
| Haibo Zhang                                                                                           |
| Jianxin Zhang                                                                                         |
| Lihua Zhang                                                                                           |
| Liping Zhang                                                                                          |
| Ning Zhang                                                                                            |
| Hui Zhong                                                                                             |
| <b>Estudios Clínicos Latino America (ECLA) - Argentina</b>                                            |
| Rafael Diaz*                                                                                          |
| Claudia Escobar                                                                                       |
| Maria Eugenia Martin*                                                                                 |
| Andrea Pascual                                                                                        |
| <b>Foundation for Biomedical Research of La Paz University Hospital (FIBHULP) - Spain</b>             |
| José Lopez-Sendon (Country Leader)                                                                    |
| Almudena Castro                                                                                       |
| Maria Posada*                                                                                         |
| José Luis Narro Villanueva                                                                            |
| <b>French Alliance for Cardiovascular Trials (FACT) - France</b>                                      |
| Gabriel Steg (Country Leader)                                                                         |
| Helene Abergel                                                                                        |
| Jean Michel Juliard                                                                                   |
| <b>Green Lane Coordinating Centre Ltd. (GLCC) -Malaysia, New Zealand, Singapore, Taiwan, Thailand</b> |
| Harvey White (Country Leader)                                                                         |
| Caroline Alsweiler                                                                                    |
| <b>KU Leuven Research &amp; Development - Belgium*</b>                                                |
| Frans Van de Werf (Country Leader)                                                                    |
| Kathleen Claes                                                                                        |
| Kaatje Goetschalckx                                                                                   |
| Ann Luyten                                                                                            |
| Valerie Robesyn                                                                                       |
| <b>South Australian Health and Medical Research Institute Ltd (SAHMRI) - Australia</b>                |
| Joseph B. Selvanayagam (Country Leader)                                                               |
| Deirdre Murphy                                                                                        |
| <b>Contract Research Organizations (CROs) for ISCHEMIA Trial</b>                                      |
| <b>FOCUS Clinical Research Center d.o.o. Belgrade - Serbia</b>                                        |
| Nevena Garcevic                                                                                       |
| Jelena Stojkovic                                                                                      |
| <b>iProcess Global Research Inc. - India</b>                                                          |
| Asker Ahmed                                                                                           |
| Richa Bhatt                                                                                           |
| Nitika Chadha                                                                                         |
| Vijay Kumar*                                                                                          |
| Sadath Lubna*                                                                                         |

|                                                  |
|--------------------------------------------------|
| Shruti Pandey*                                   |
| Karthik Ramasamy                                 |
| Mohammed Saleem                                  |
| Hemalata Siddaram*                               |
| *past members / past organizations<br>**deceased |
|                                                  |

**eTable 3  
Ischemia Definitions**

| <b>Stress Test Modality</b>                                                                                                                  | <b>Severe Ischemia</b>                                                                                                                                                                                                                                                                                                                                                                                                                                                                                                                                                                                                                                                                                                                                                                                                                                                                                                                | <b>Moderate Ischemia</b>                                                                                                                                                                                                                                                                                                                                                                                                                                                                                                                                                                                                         | <b>Mild Ischemia</b>                                                                                                                                                                                                                                                       | <b>No Ischemia</b>                                                                                  |
|----------------------------------------------------------------------------------------------------------------------------------------------|---------------------------------------------------------------------------------------------------------------------------------------------------------------------------------------------------------------------------------------------------------------------------------------------------------------------------------------------------------------------------------------------------------------------------------------------------------------------------------------------------------------------------------------------------------------------------------------------------------------------------------------------------------------------------------------------------------------------------------------------------------------------------------------------------------------------------------------------------------------------------------------------------------------------------------------|----------------------------------------------------------------------------------------------------------------------------------------------------------------------------------------------------------------------------------------------------------------------------------------------------------------------------------------------------------------------------------------------------------------------------------------------------------------------------------------------------------------------------------------------------------------------------------------------------------------------------------|----------------------------------------------------------------------------------------------------------------------------------------------------------------------------------------------------------------------------------------------------------------------------|-----------------------------------------------------------------------------------------------------|
| Nuclear                                                                                                                                      | ≥15% Ischemic Myocardium                                                                                                                                                                                                                                                                                                                                                                                                                                                                                                                                                                                                                                                                                                                                                                                                                                                                                                              | 10-14.9% Ischemic Myocardium                                                                                                                                                                                                                                                                                                                                                                                                                                                                                                                                                                                                     | 5-9.9% Ischemic Myocardium                                                                                                                                                                                                                                                 | <5% Ischemic Myocardium                                                                             |
| Echo                                                                                                                                         | ≥4/16 segments with stress-induced severe hypokinesia, akinesia or dyskinesia                                                                                                                                                                                                                                                                                                                                                                                                                                                                                                                                                                                                                                                                                                                                                                                                                                                         | 3/16 segments with stress-induced severe hypokinesia, akinesia or dyskinesia                                                                                                                                                                                                                                                                                                                                                                                                                                                                                                                                                     | 1-2/16 segments with stress-induced wall motion abnormality                                                                                                                                                                                                                | No stress-induced wall motion abnormalities                                                         |
| Cardiac Magnetic Resonance (CMR) Perfusion                                                                                                   | ≥25% (8 of 32 subsegments) Ischemic Myocardium                                                                                                                                                                                                                                                                                                                                                                                                                                                                                                                                                                                                                                                                                                                                                                                                                                                                                        | 12.5-24.9% (4-7 of 32 subsegments) Ischemic Myocardium                                                                                                                                                                                                                                                                                                                                                                                                                                                                                                                                                                           | 1-12.4% (1-3 of 32 subsegments) Ischemic Myocardium                                                                                                                                                                                                                        | No Ischemic Subsegments                                                                             |
| Exercise Tolerance Test (ETT)                                                                                                                | <ol style="list-style-type: none"> <li>1. Clinical history of typical angina or typical angina during the exercise test</li> <li>2. Absence of resting ST-segment depression ≥1.0 mm or confounders that render exercise ECG non-interpretable (LBBB, LVH with repolarization, pacemaker, etc.)</li> <li>3. As compared to the baseline tracing, additional exercise-induced horizontal or downsloping ST-segment depression ≥1.5 mm in 2 leads or ≥2.0 mm in any lead; ST-segment elevation ≥1mm in a non-infarct territory.</li> <li>4. Either of the following: <ol style="list-style-type: none"> <li>a. Workload at which ST-segment criteria are met is not to exceed completion of stage 2 of a standard Bruce protocol or 7 METs if a non-Bruce protocol is used or</li> <li>b. ST segment criteria are met at &lt;75% of the maximum predicted HR</li> </ol> <i>Note: Anatomic eligibility must be confirmed</i> </li> </ol> | <p>Moderate ischemia: either A or B.</p> <p>A) Meets ST segment criteria as stated in the protocol (items 2 + 3 below) during exercise and/or recovery AND either does not meet symptom criteria (item 1 below) OR does not meet workload criterion (item 4 below). An example would be a case meeting the ST depression criteria at &gt;7 METs</p> <p>B) Ischemic ST depression ≥1mm during exercise and/or recovery and peak workload &lt;7 METS but does not meet ISCHEMIA trial criteria (for severe ischemia). An example would be a case with 1.2 mm ST depression in ≥ 2 leads (check this) and peak workload 5 METs.</p> | <p>ST segment depression of at least 1.0 mm in the worst lead during exercise and/or recovery, but not meeting the moderate or severe ischemia definition and either meeting or not meeting the symptom criteria. An example would be 1.2 mm ST depression at 10 METs.</p> | No ischemia; Uninterpretable if there were confounders on the resting ECG precluding interpretation |
| Trial criteria for eligibility (indicated by unshaded boxes): moderate or severe ischemia by nuclear, echo or CMR, or severe ischemia by ETT |                                                                                                                                                                                                                                                                                                                                                                                                                                                                                                                                                                                                                                                                                                                                                                                                                                                                                                                                       |                                                                                                                                                                                                                                                                                                                                                                                                                                                                                                                                                                                                                                  |                                                                                                                                                                                                                                                                            |                                                                                                     |

**eTable 4**  
**Randomized Participant Baseline Vital Signs and Laboratory Values**  
**Intent-to-Treat Population**

| Characteristic                             | All Randomized<br>Participants<br>(N=5,179) |
|--------------------------------------------|---------------------------------------------|
| <b>Vital Signs</b>                         |                                             |
| Heart Rate (bpm)                           |                                             |
| N                                          | 5,146                                       |
| Median (25th, 75th)                        | 67 (60, 75)                                 |
| Systolic Blood Pressure (mmHg)             |                                             |
| N                                          | 5,150                                       |
| Median (25th, 75th)                        | 130 (120, 142)                              |
| Diastolic Blood Pressure (mmHg)            |                                             |
| N                                          | 5,150                                       |
| Median (25th, 75th)                        | 77 (70, 81)                                 |
| Body Mass Index (BMI) (kg/m <sup>2</sup> ) |                                             |
| N                                          | 5,124                                       |
| Median (25th, 75th)                        | 27.7 (25.0, 31.2)                           |
| <b>Lab Values</b>                          |                                             |
| <i>Lipid Panel</i>                         |                                             |
| Total Cholesterol (mg/dL)                  |                                             |
| N                                          | 5,074                                       |
| Median (25th, 75th)                        | 154.3 (129.2, 185.6)                        |
| Triglycerides (mg/dL)                      |                                             |
| N                                          | 4,984                                       |
| Median (25th, 75th)                        | 124.0 (91.2, 177.0)                         |
| HDL Cholesterol (mg/dL)                    |                                             |
| N                                          | 5,023                                       |
| Median (25th, 75th)                        | 42.5 (36.0, 51.0)                           |
| LDL Cholesterol (mg/dL)                    |                                             |
| N                                          | 4,941                                       |
| Median (25th, 75th)                        | 83.0 (63.0, 110.6)                          |
| HbA1c for Diabetics (%)                    |                                             |
| N                                          | 1,960                                       |
| Median (25th, 75th)                        | 7.2 (6.5, 8.3)                              |
| <i>Complete Blood Counts</i>               |                                             |
| Hemoglobin (g/dL)                          |                                             |
| N                                          | 4,886                                       |
| Median (25th, 75th)                        | 14.0 (13.0, 15.0)                           |
| Platelets (10 <sup>9</sup> /L)             |                                             |
| N                                          | 4,821                                       |
| Median (25th, 75th)                        | 220 (182, 261)                              |
| WBC (10 <sup>9</sup> /L)                   |                                             |
| N                                          | 4,830                                       |
| Median (25th, 75th)                        | 7.2 (6.1, 8.6)                              |
| <i>Chemistry Panel</i>                     |                                             |
| Enrollment Creatinine (mg/dL)              |                                             |
| N                                          | 5,179                                       |
| Median (25th, 75th)                        | 0.9 (0.8, 1.1)                              |
| Estimated GFR from Enrollment (mL/min)     |                                             |
| N                                          | 5,179                                       |

|                     |             |
|---------------------|-------------|
| Median (25th, 75th) | 81 (67, 97) |
|---------------------|-------------|

Generated from /dcri/ct/ischemia/manu/02\_secondary/isch04\_baseline/programs/etable4\_vitals\_labs.sas on 17DEC2018 at 14:22

**eTable 5**  
**Randomized Participant Baseline Medications**  
**Intent-to-Treat Population**

| Characteristic                                                                                                                                                                                                                                                                                                                                                                                                                                                                                                                                                                                                                                                                                                                                                                                                                                          | All Randomized Participants<br>(N=5,179) |
|---------------------------------------------------------------------------------------------------------------------------------------------------------------------------------------------------------------------------------------------------------------------------------------------------------------------------------------------------------------------------------------------------------------------------------------------------------------------------------------------------------------------------------------------------------------------------------------------------------------------------------------------------------------------------------------------------------------------------------------------------------------------------------------------------------------------------------------------------------|------------------------------------------|
| Anti-platelet Medications                                                                                                                                                                                                                                                                                                                                                                                                                                                                                                                                                                                                                                                                                                                                                                                                                               | 4,871/5,175 (94.1%)                      |
| Aspirin                                                                                                                                                                                                                                                                                                                                                                                                                                                                                                                                                                                                                                                                                                                                                                                                                                                 | 4,647/5,175 (89.8%)                      |
| Clopidogrel                                                                                                                                                                                                                                                                                                                                                                                                                                                                                                                                                                                                                                                                                                                                                                                                                                             | 1,344/5,175 (26.0%)                      |
| Other <sup>1</sup>                                                                                                                                                                                                                                                                                                                                                                                                                                                                                                                                                                                                                                                                                                                                                                                                                                      | 116/5,175 (2.2%)                         |
|                                                                                                                                                                                                                                                                                                                                                                                                                                                                                                                                                                                                                                                                                                                                                                                                                                                         |                                          |
| Anticoagulant Medications                                                                                                                                                                                                                                                                                                                                                                                                                                                                                                                                                                                                                                                                                                                                                                                                                               | 202/5,131 (3.9%)                         |
| Warfarin                                                                                                                                                                                                                                                                                                                                                                                                                                                                                                                                                                                                                                                                                                                                                                                                                                                | 105/5,131 (2.0%)                         |
| Dabigatran, Apixaban, Rivaroxaban                                                                                                                                                                                                                                                                                                                                                                                                                                                                                                                                                                                                                                                                                                                                                                                                                       | 90/5,131 (1.8%)                          |
| Other <sup>2</sup>                                                                                                                                                                                                                                                                                                                                                                                                                                                                                                                                                                                                                                                                                                                                                                                                                                      | 8/5,131 (0.2%)                           |
|                                                                                                                                                                                                                                                                                                                                                                                                                                                                                                                                                                                                                                                                                                                                                                                                                                                         |                                          |
| Anti-platelet or Anticoagulant Medications                                                                                                                                                                                                                                                                                                                                                                                                                                                                                                                                                                                                                                                                                                                                                                                                              | 4,976/5,174 (96.2%)                      |
|                                                                                                                                                                                                                                                                                                                                                                                                                                                                                                                                                                                                                                                                                                                                                                                                                                                         |                                          |
| Statins                                                                                                                                                                                                                                                                                                                                                                                                                                                                                                                                                                                                                                                                                                                                                                                                                                                 | 4,904/5,173 (94.8%)                      |
| <i>Statin Type</i>                                                                                                                                                                                                                                                                                                                                                                                                                                                                                                                                                                                                                                                                                                                                                                                                                                      |                                          |
| Rosuvastatin                                                                                                                                                                                                                                                                                                                                                                                                                                                                                                                                                                                                                                                                                                                                                                                                                                            | 1,169/5,173 (22.6%)                      |
| Atorvastatin                                                                                                                                                                                                                                                                                                                                                                                                                                                                                                                                                                                                                                                                                                                                                                                                                                            | 2,948/5,173 (57.0%)                      |
| Simvastatin                                                                                                                                                                                                                                                                                                                                                                                                                                                                                                                                                                                                                                                                                                                                                                                                                                             | 652/5,173 (12.6%)                        |
| Other                                                                                                                                                                                                                                                                                                                                                                                                                                                                                                                                                                                                                                                                                                                                                                                                                                                   | 404/5,173 (7.8%)                         |
|                                                                                                                                                                                                                                                                                                                                                                                                                                                                                                                                                                                                                                                                                                                                                                                                                                                         |                                          |
| High-Intensity Statin <sup>3</sup>                                                                                                                                                                                                                                                                                                                                                                                                                                                                                                                                                                                                                                                                                                                                                                                                                      |                                          |
| Yes                                                                                                                                                                                                                                                                                                                                                                                                                                                                                                                                                                                                                                                                                                                                                                                                                                                     | 1,900/5,173 (36.7%)                      |
| No/Unknown Dose                                                                                                                                                                                                                                                                                                                                                                                                                                                                                                                                                                                                                                                                                                                                                                                                                                         | 3,273/5,173 (63.3%)                      |
|                                                                                                                                                                                                                                                                                                                                                                                                                                                                                                                                                                                                                                                                                                                                                                                                                                                         |                                          |
| Ezetimibe                                                                                                                                                                                                                                                                                                                                                                                                                                                                                                                                                                                                                                                                                                                                                                                                                                               | 211/5,175 (4.1%)                         |
| Fibrate                                                                                                                                                                                                                                                                                                                                                                                                                                                                                                                                                                                                                                                                                                                                                                                                                                                 | 146/5,175 (2.8%)                         |
| Fish Oil                                                                                                                                                                                                                                                                                                                                                                                                                                                                                                                                                                                                                                                                                                                                                                                                                                                | 191/5,175 (3.7%)                         |
| Other Lipid Lowering Medication <sup>4</sup>                                                                                                                                                                                                                                                                                                                                                                                                                                                                                                                                                                                                                                                                                                                                                                                                            | 38/5,175 (0.7%)                          |
|                                                                                                                                                                                                                                                                                                                                                                                                                                                                                                                                                                                                                                                                                                                                                                                                                                                         |                                          |
| Anti-Hypertensive and Anti-Ischemic/Anginal Medications                                                                                                                                                                                                                                                                                                                                                                                                                                                                                                                                                                                                                                                                                                                                                                                                 | 5,017/5,175 (96.9%)                      |
| Beta Blocker                                                                                                                                                                                                                                                                                                                                                                                                                                                                                                                                                                                                                                                                                                                                                                                                                                            | 4,161/5,175 (80.4%)                      |
| Calcium Channel Blocker                                                                                                                                                                                                                                                                                                                                                                                                                                                                                                                                                                                                                                                                                                                                                                                                                                 | 1,576/5,175 (30.5%)                      |
| ACE Inhibitor                                                                                                                                                                                                                                                                                                                                                                                                                                                                                                                                                                                                                                                                                                                                                                                                                                           | 2,140/5,175 (41.4%)                      |
| Angiotensin Receptor Blocker (ARB)                                                                                                                                                                                                                                                                                                                                                                                                                                                                                                                                                                                                                                                                                                                                                                                                                      | 1,308/5,175 (25.3%)                      |
| ACE Inhibitor or ARB                                                                                                                                                                                                                                                                                                                                                                                                                                                                                                                                                                                                                                                                                                                                                                                                                                    | 3,413/5,175 (66.0%)                      |
| Aldosterone Antagonist                                                                                                                                                                                                                                                                                                                                                                                                                                                                                                                                                                                                                                                                                                                                                                                                                                  | 115/5,175 (2.2%)                         |
| Diuretic                                                                                                                                                                                                                                                                                                                                                                                                                                                                                                                                                                                                                                                                                                                                                                                                                                                | 1,081/5,175 (20.9%)                      |
| Alpha 1 Blocker                                                                                                                                                                                                                                                                                                                                                                                                                                                                                                                                                                                                                                                                                                                                                                                                                                         | 184/5,175 (3.6%)                         |
| Long-acting Nitrate                                                                                                                                                                                                                                                                                                                                                                                                                                                                                                                                                                                                                                                                                                                                                                                                                                     | 1,672/5,175 (32.3%)                      |
| Ranolazine                                                                                                                                                                                                                                                                                                                                                                                                                                                                                                                                                                                                                                                                                                                                                                                                                                              | 260/5,175 (5.0%)                         |
| Trimetazadine                                                                                                                                                                                                                                                                                                                                                                                                                                                                                                                                                                                                                                                                                                                                                                                                                                           | 245/5,175 (4.7%)                         |
| Ivabradine                                                                                                                                                                                                                                                                                                                                                                                                                                                                                                                                                                                                                                                                                                                                                                                                                                              | 60/5,175 (1.2%)                          |
| Nicorandil                                                                                                                                                                                                                                                                                                                                                                                                                                                                                                                                                                                                                                                                                                                                                                                                                                              | 169/5,175 (3.3%)                         |
| Other <sup>5</sup>                                                                                                                                                                                                                                                                                                                                                                                                                                                                                                                                                                                                                                                                                                                                                                                                                                      | 66/5,175 (1.3%)                          |
| <sup>1</sup> Includes Ticlopidine, Prasugrel, Ticagrelor, Cilostazol, and other anti-platelet medications, including types classified as "Unknown".<br><sup>2</sup> Includes anticoagulant medications such as Enoxaparin and Dalteparin as well as types classified as "Unknown".<br><sup>3</sup> High-intensity dose of Rosuvastatin or Atorvastatin at the randomization visit. A "No/Unknown Dose" includes Not Applicable, Unknown, and NULL responses.<br><sup>4</sup> Includes medications such as Saroglitazar and Ranozex as well as medications classified as "Unknown". In addition, products such as red yeast rice and flax seed oil are also included.<br><sup>5</sup> Includes medications such as Renin Inhibitors, Hydralazine, Moxonidine as well as anti-hypertensive and anti-ischemic/anginal medications classified as "Unknown". |                                          |
