# Supplementary material
Source: PubMed Central journal article supplement (PMC6439551)
Supplement: jamacardiol-e190014-s003.pdf [file jamacardiol-e190014-s003.pdf]

## **Data Sharing Statement**

### **Data**

**Data available:** Yes

**Data types:** Deidentified participant data, Data dictionary

**How to access data:** to be determined based on NIH data sharing policy

**When available:** beginning date: 06-30-2022

### **Supporting Documents**

**Document types:** None

### **Additional Information**

**Who can access the data:** Date and methods of data sharing to be determined based on NIH data sharing policy and in discussion with NIH/NHLBI trial officer

**Types of analyses:** to be determined based on NIH data sharing policy

**Mechanisms of data availability:** to be determined based on NIH data sharing policy
